# Supplementary material
Source: PubMed Central journal article supplement (PMC4256507)

# Module 1

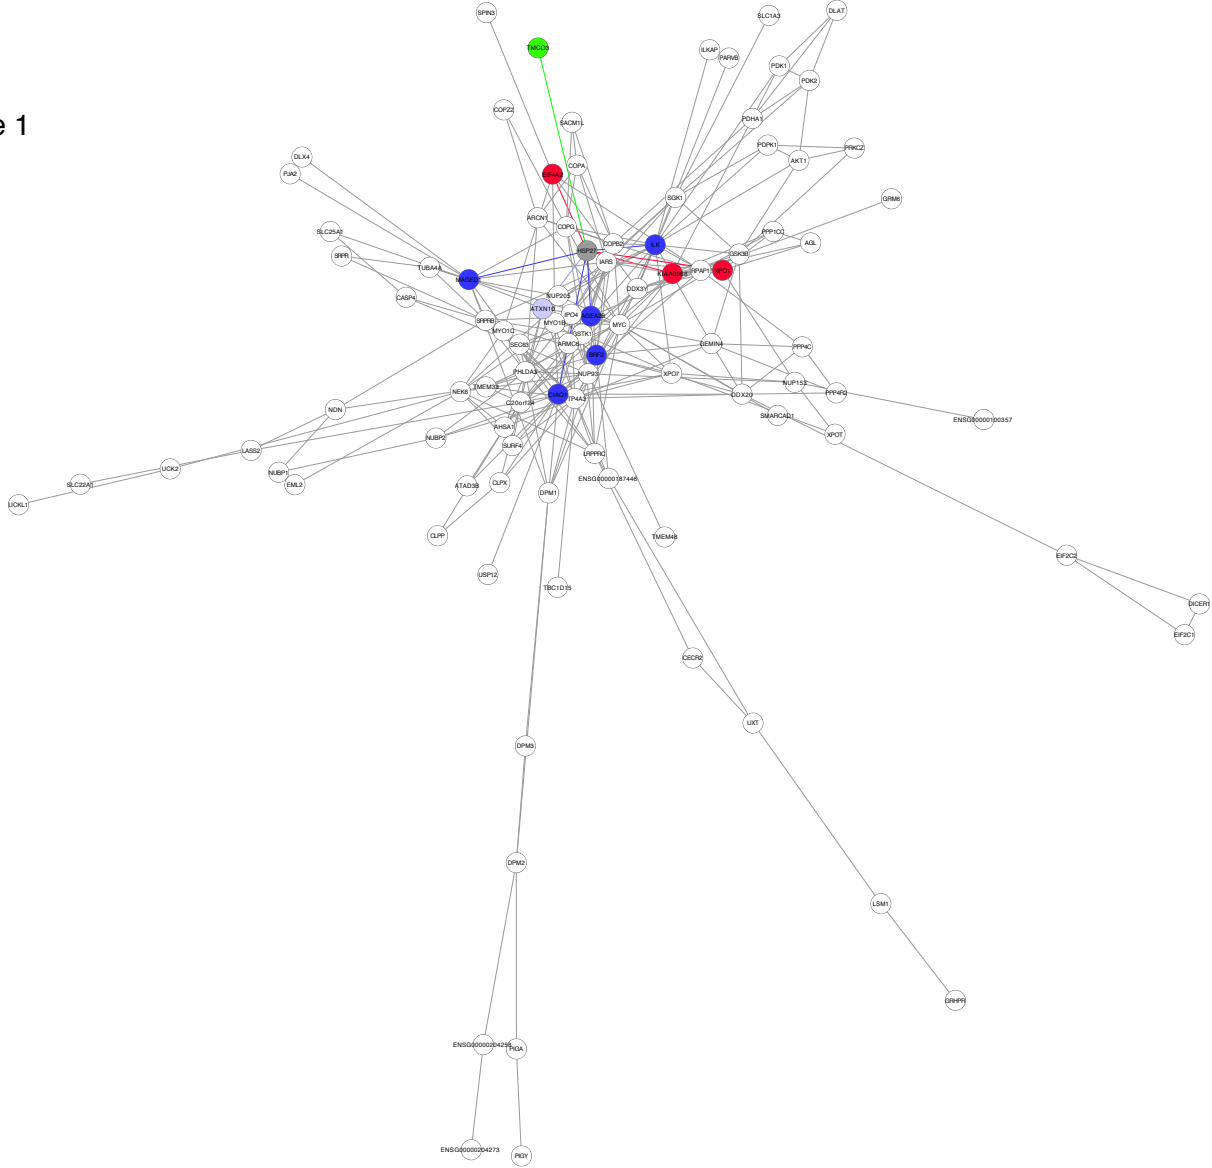

# Module 2

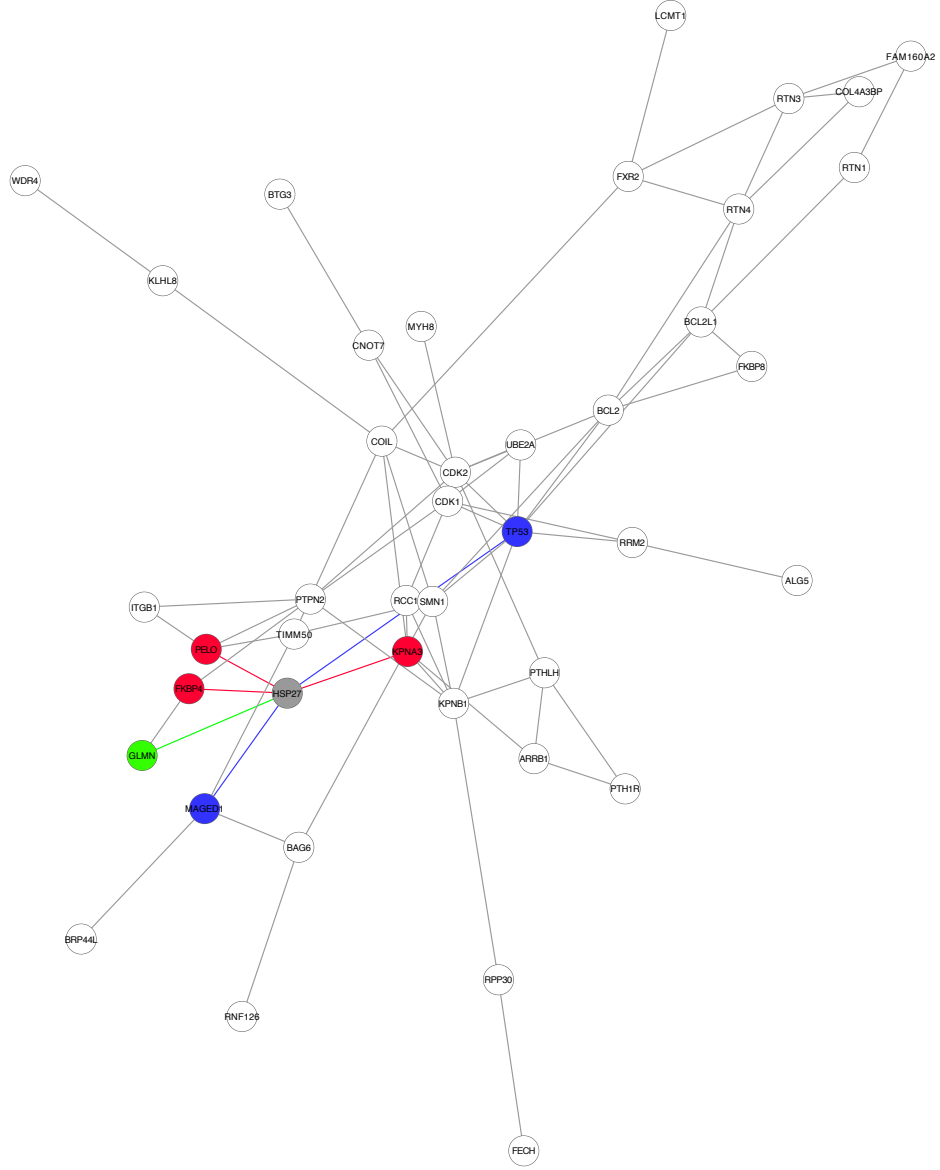

Module 3

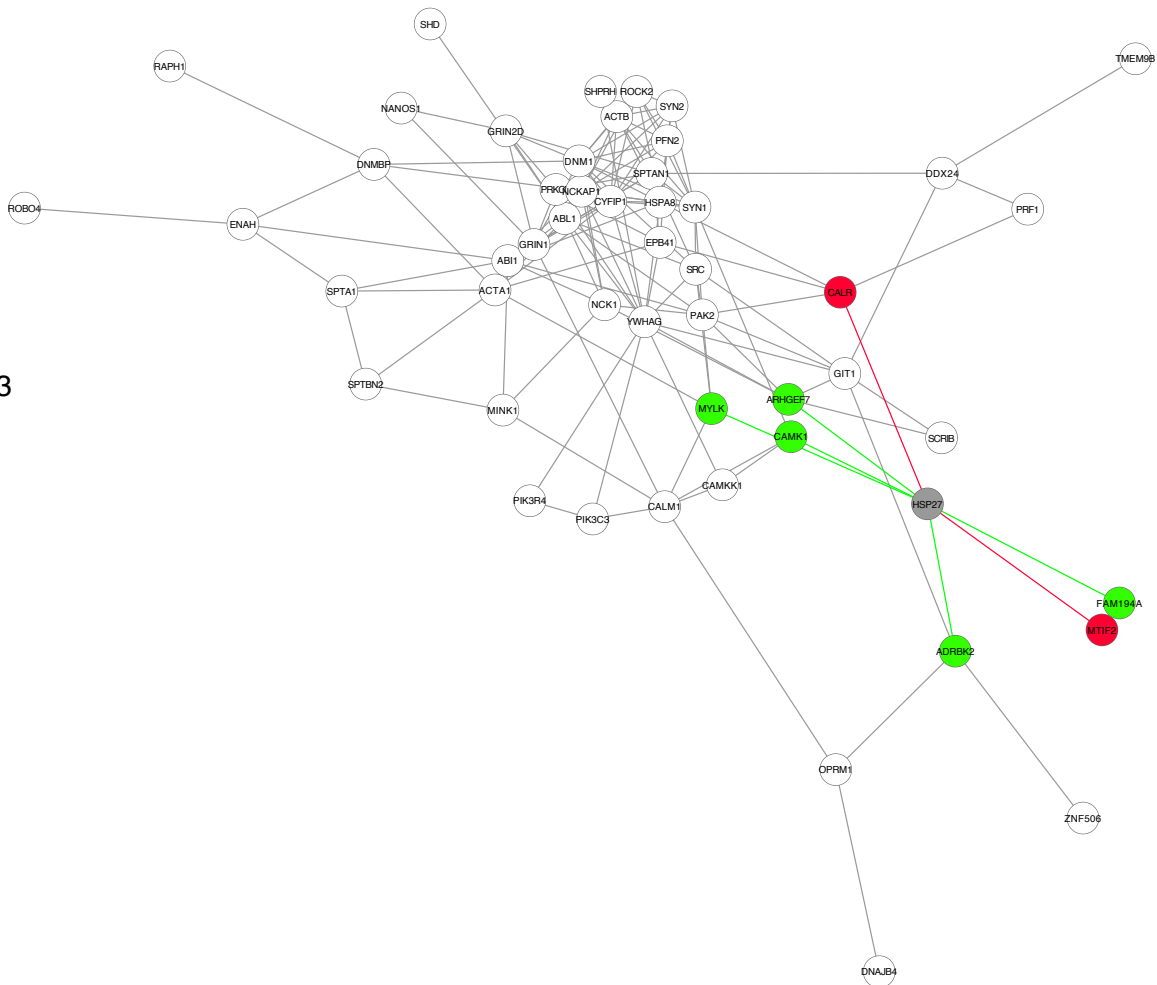

# Module 4

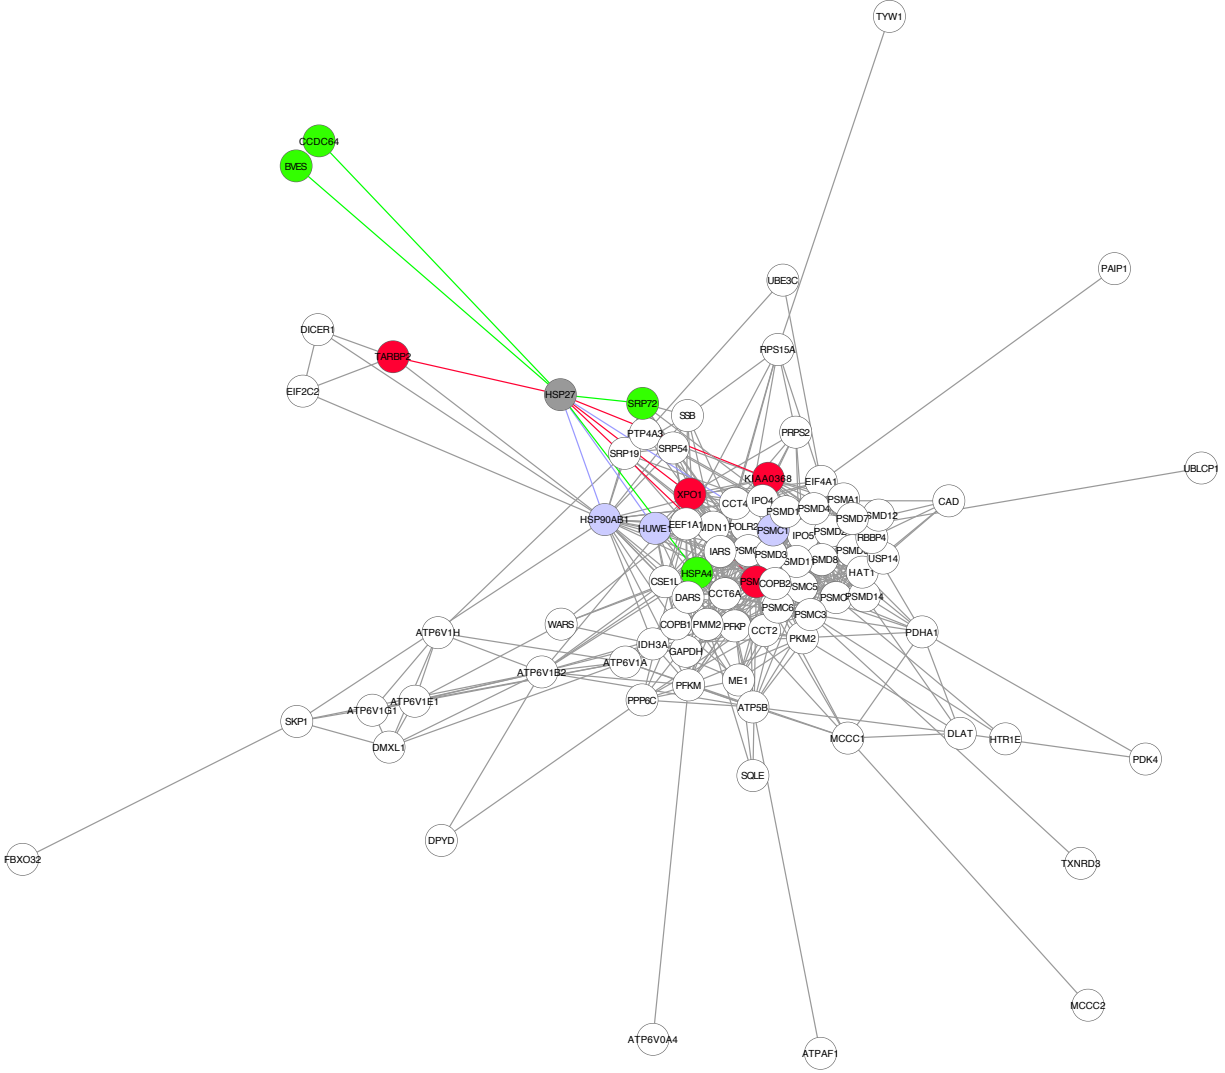

# Module 5

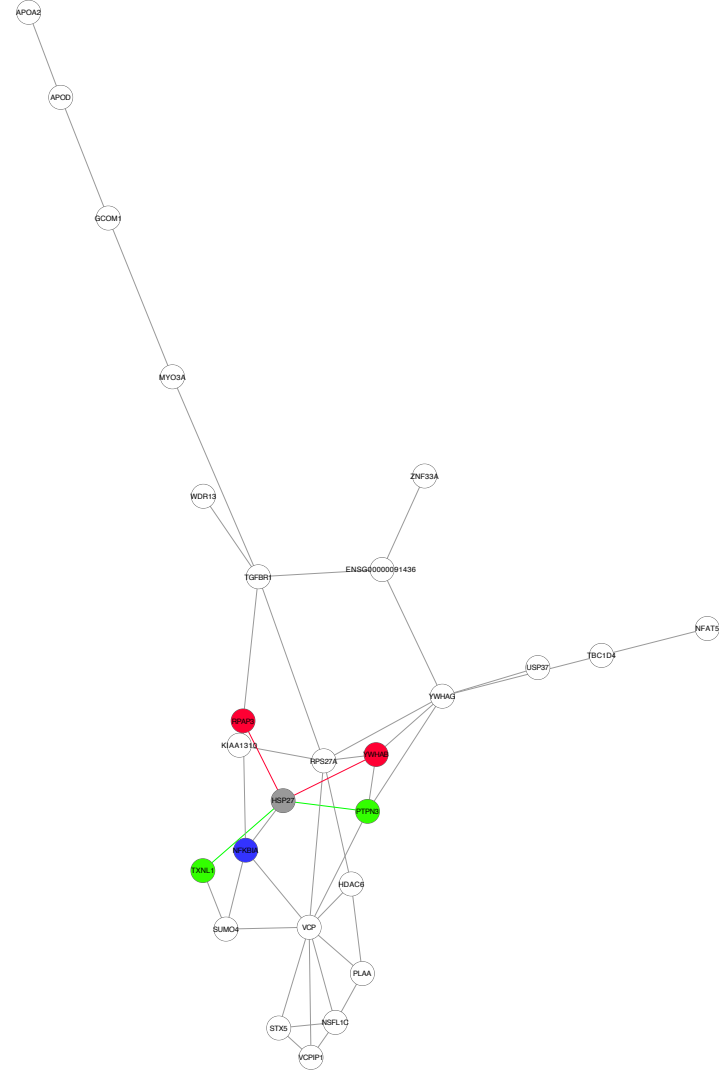

Module 6

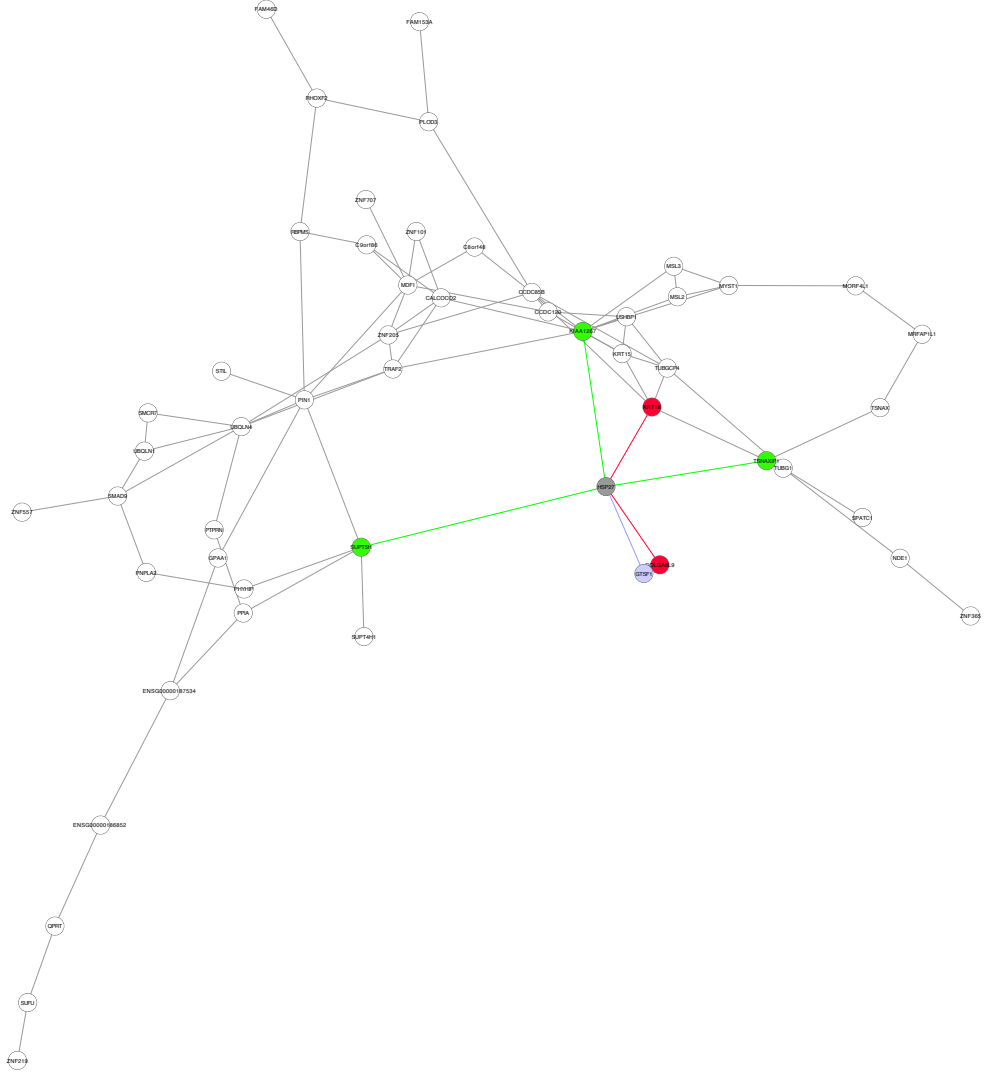

# Module 7

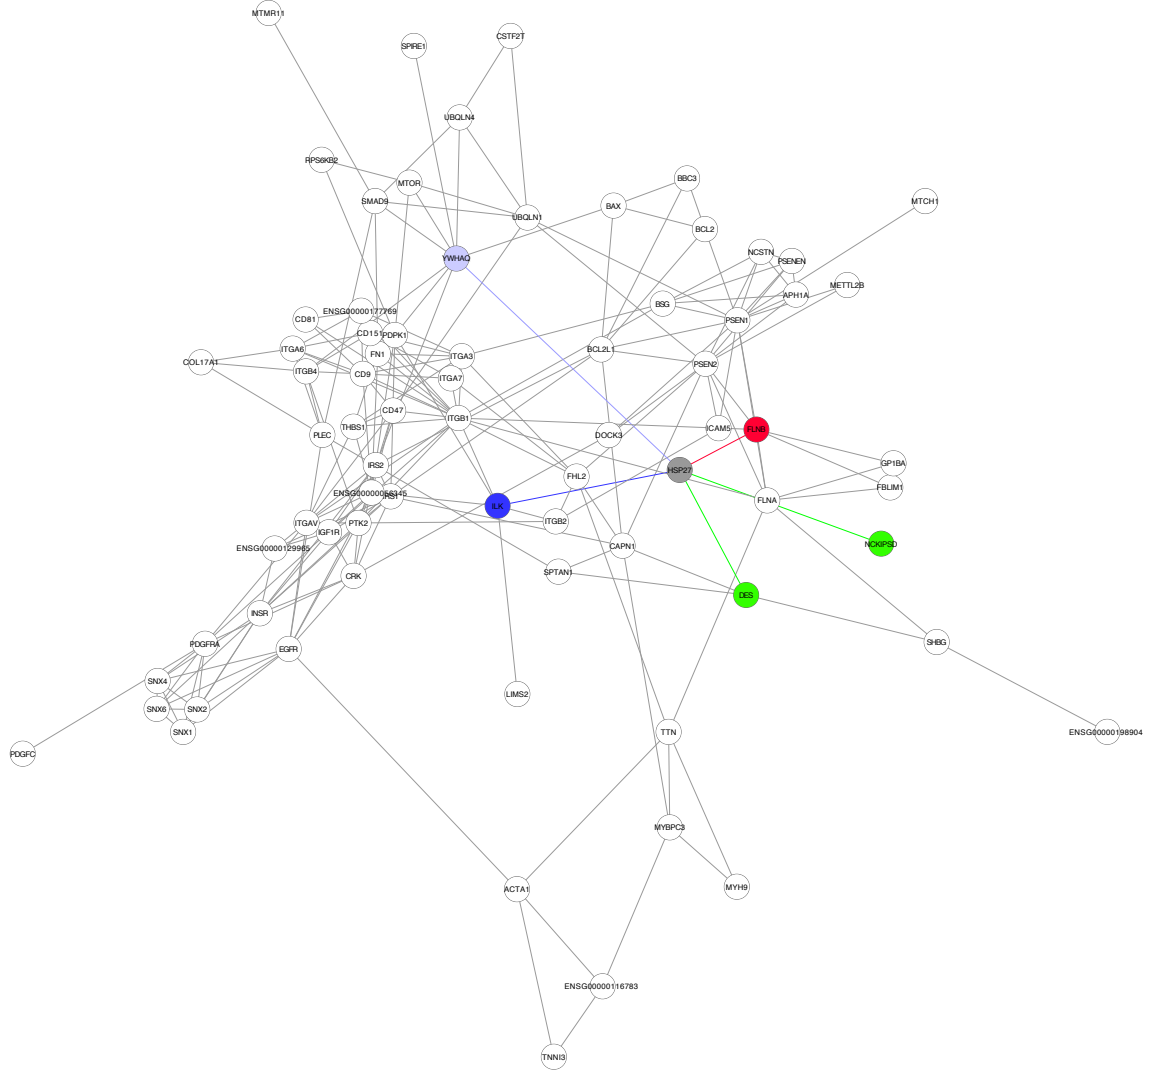

Module 8

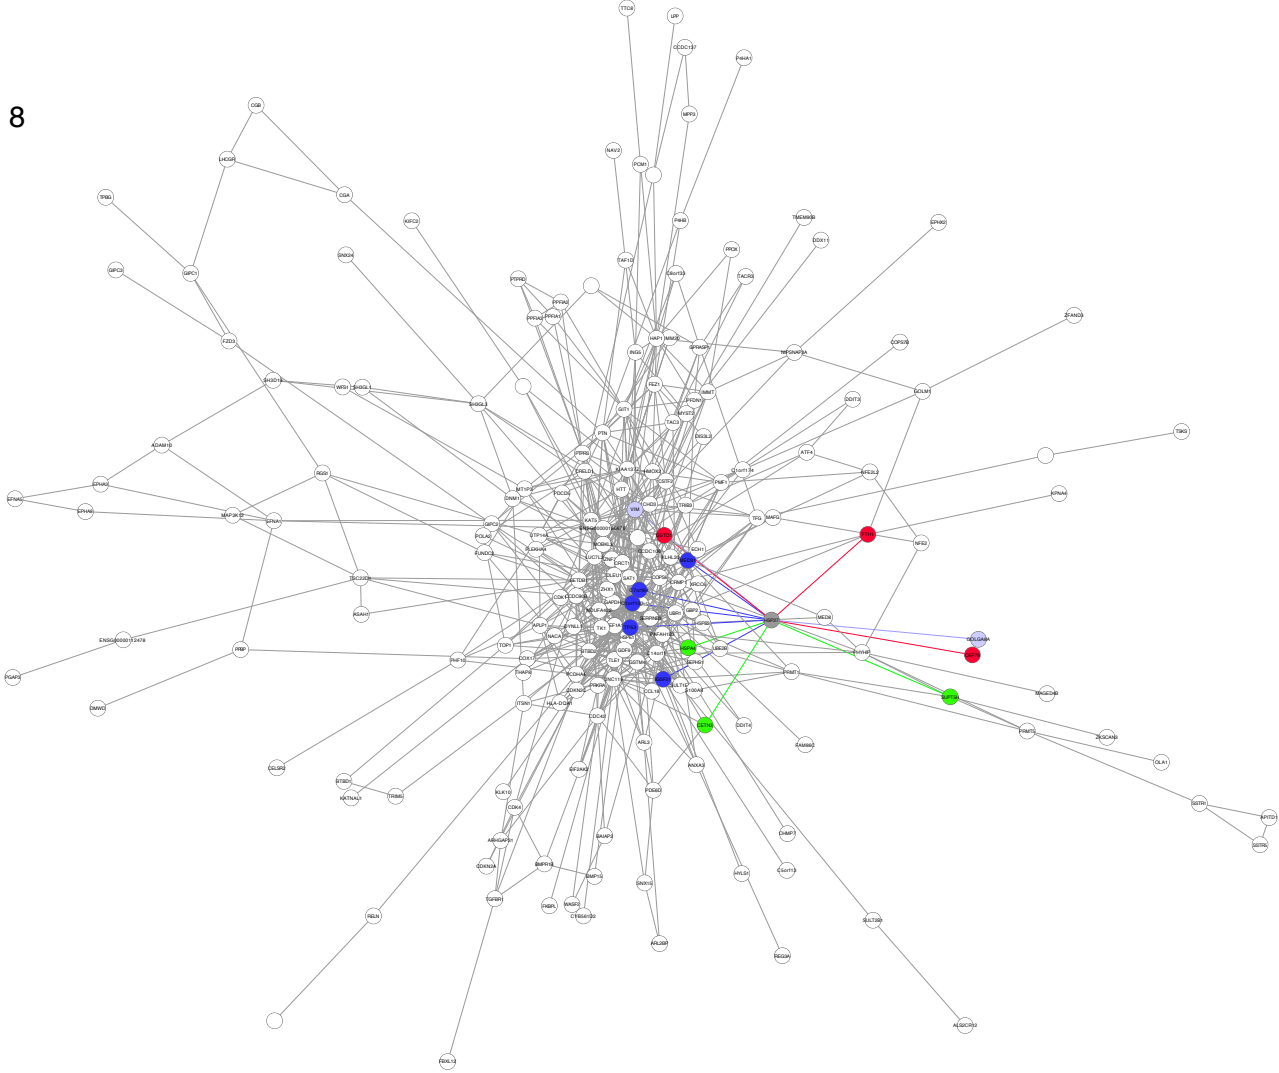



Module 9

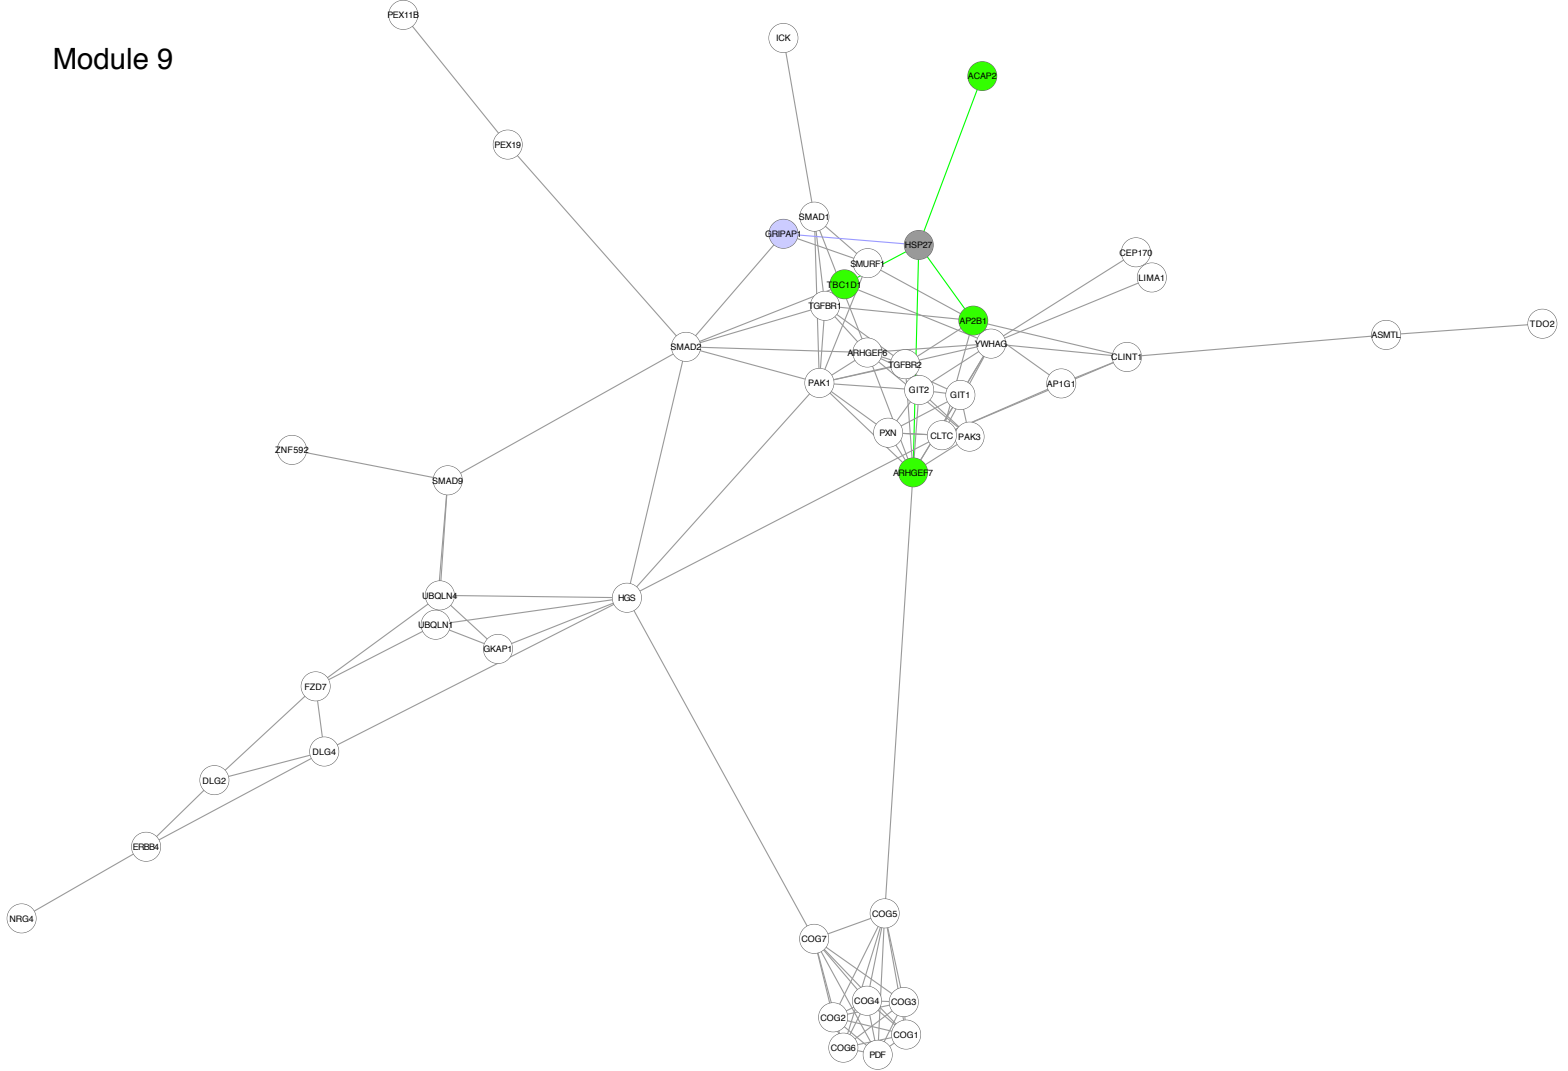

# Module 10

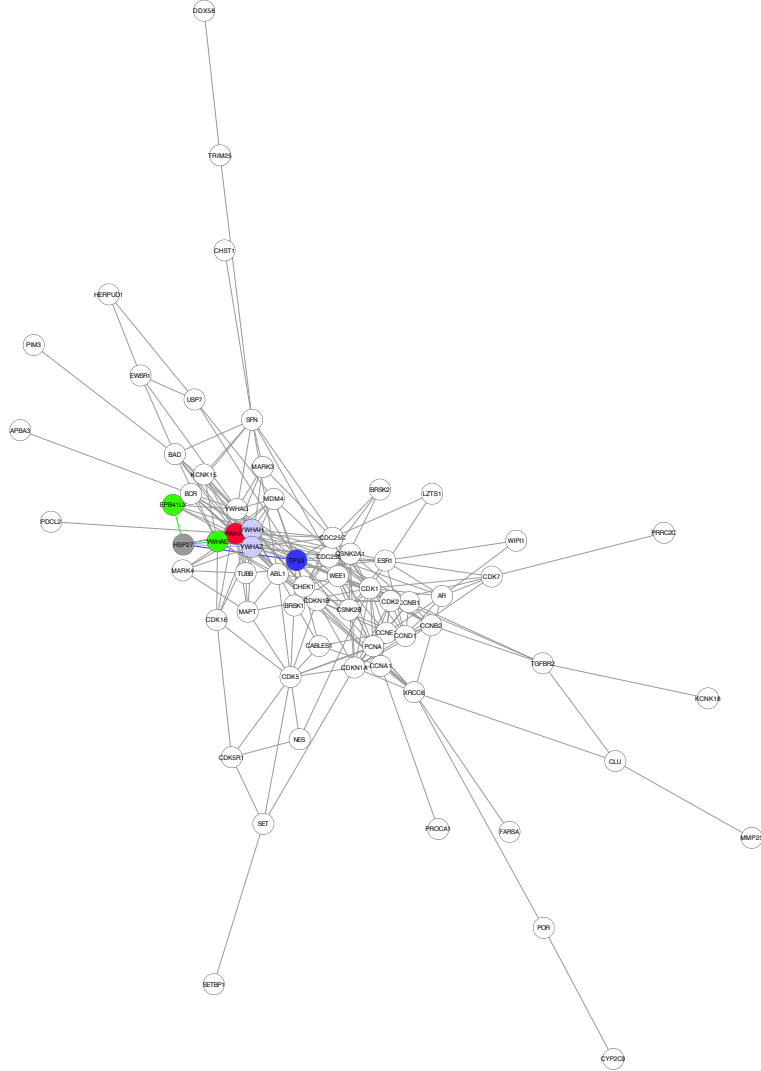

Module 11

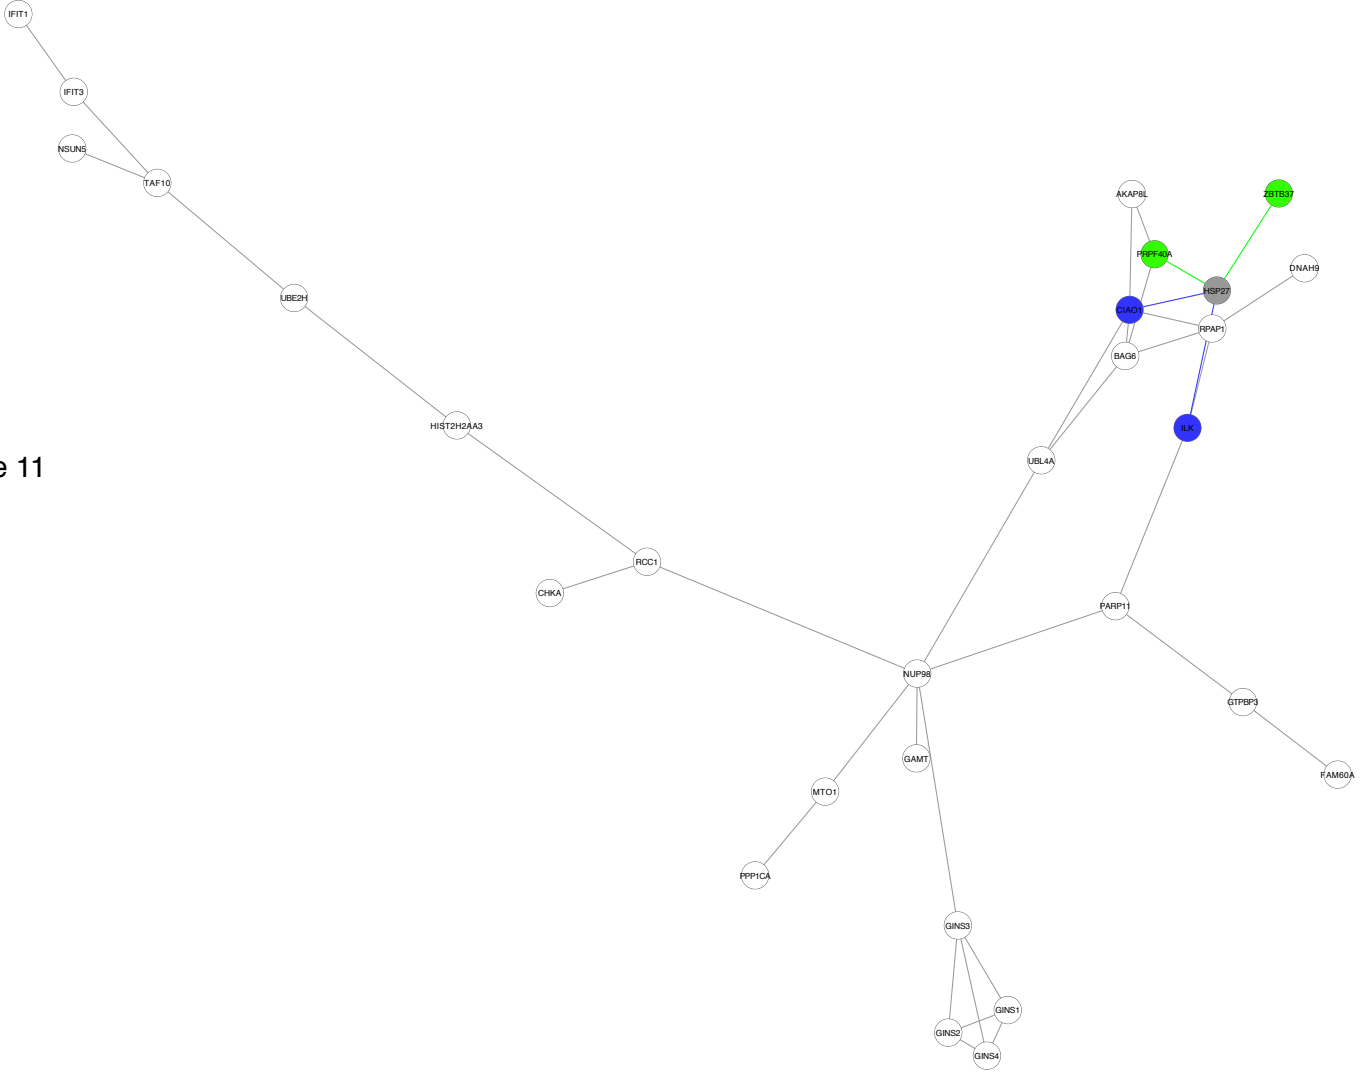

# Module 12

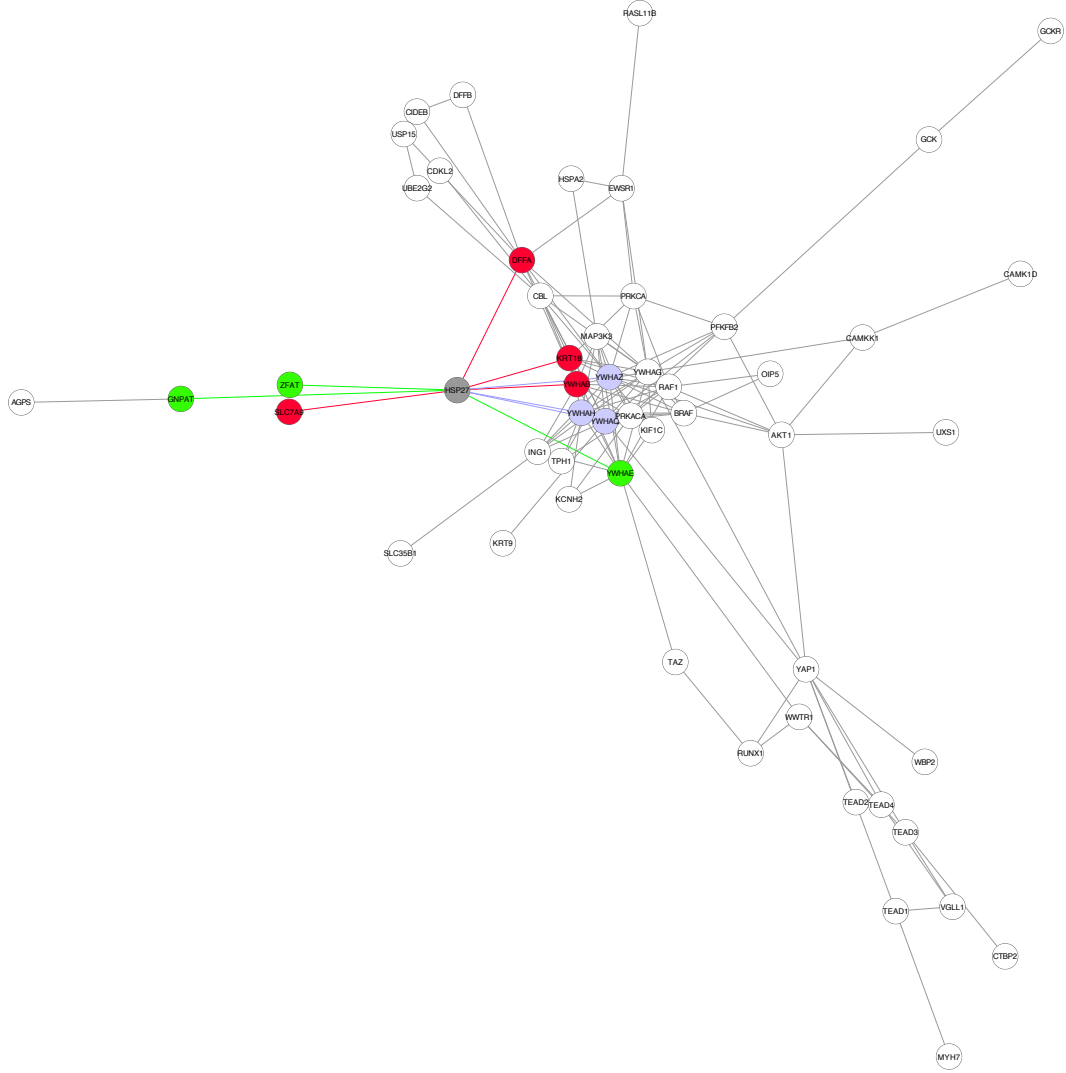

# Module 13

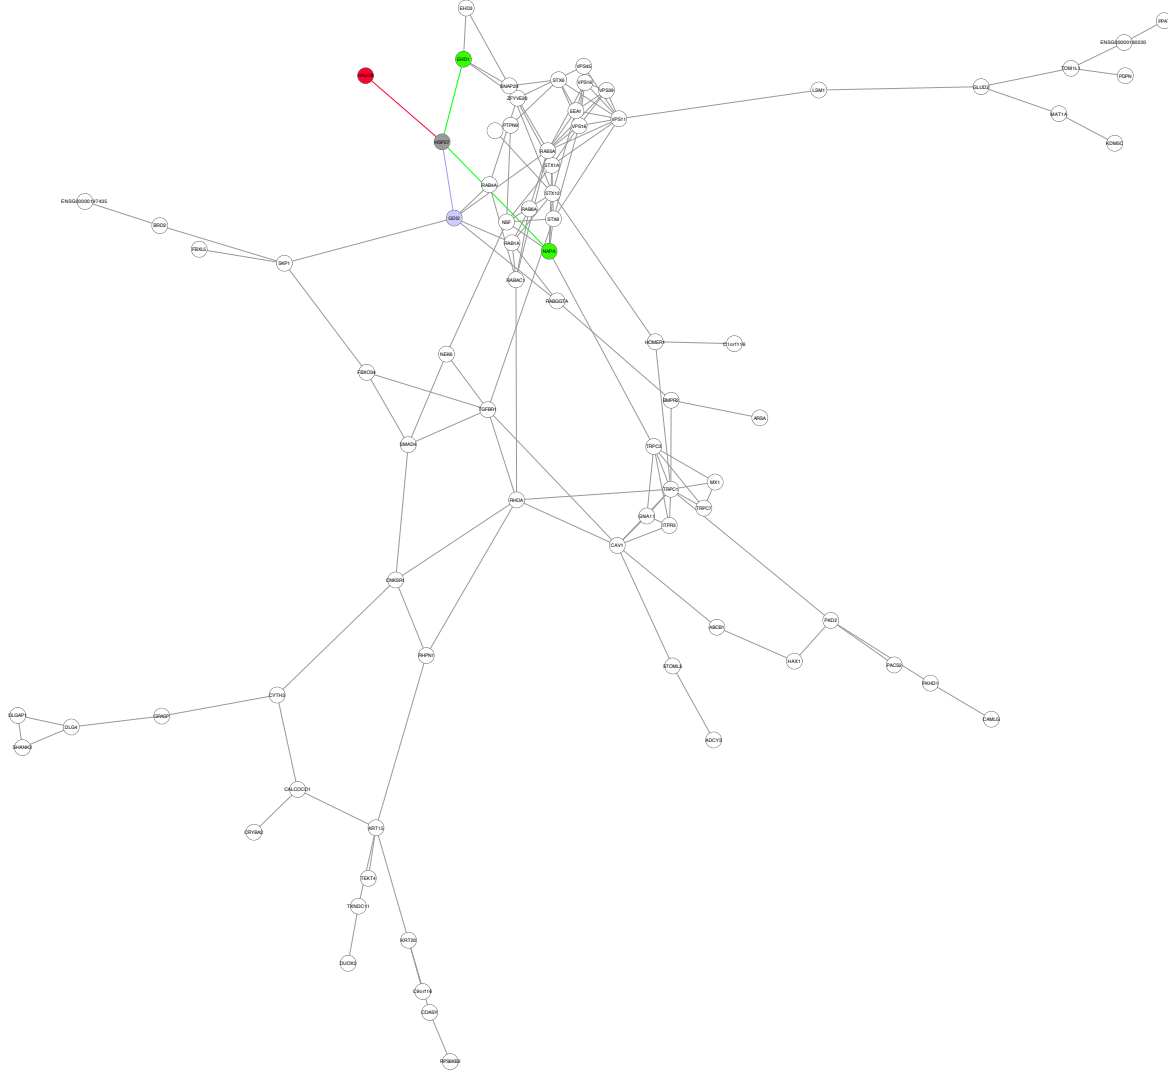

Module 14

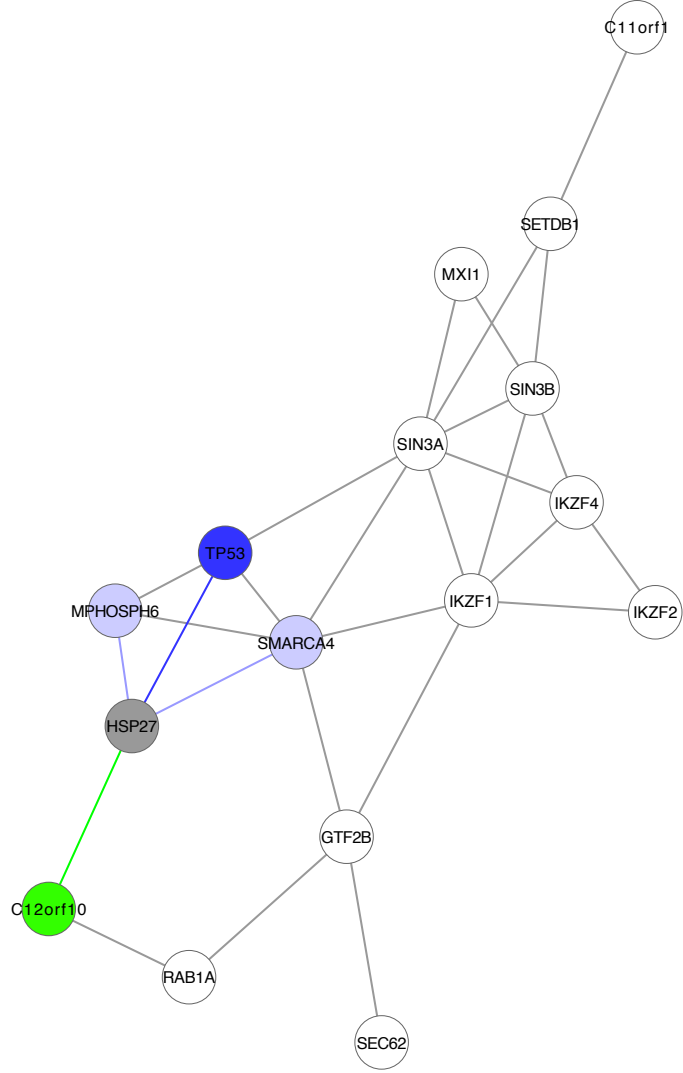

Module 15

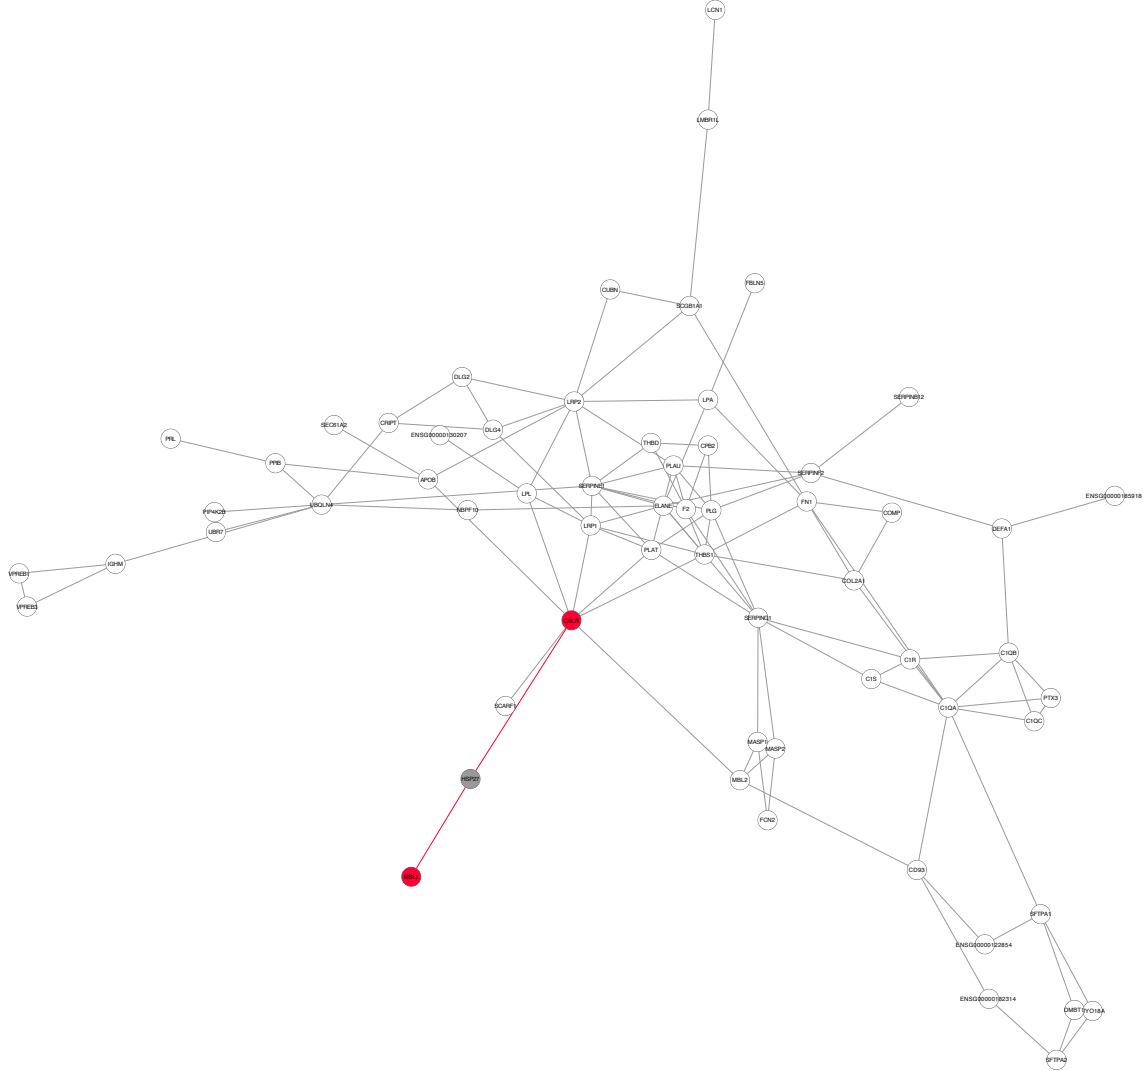

# Module 16

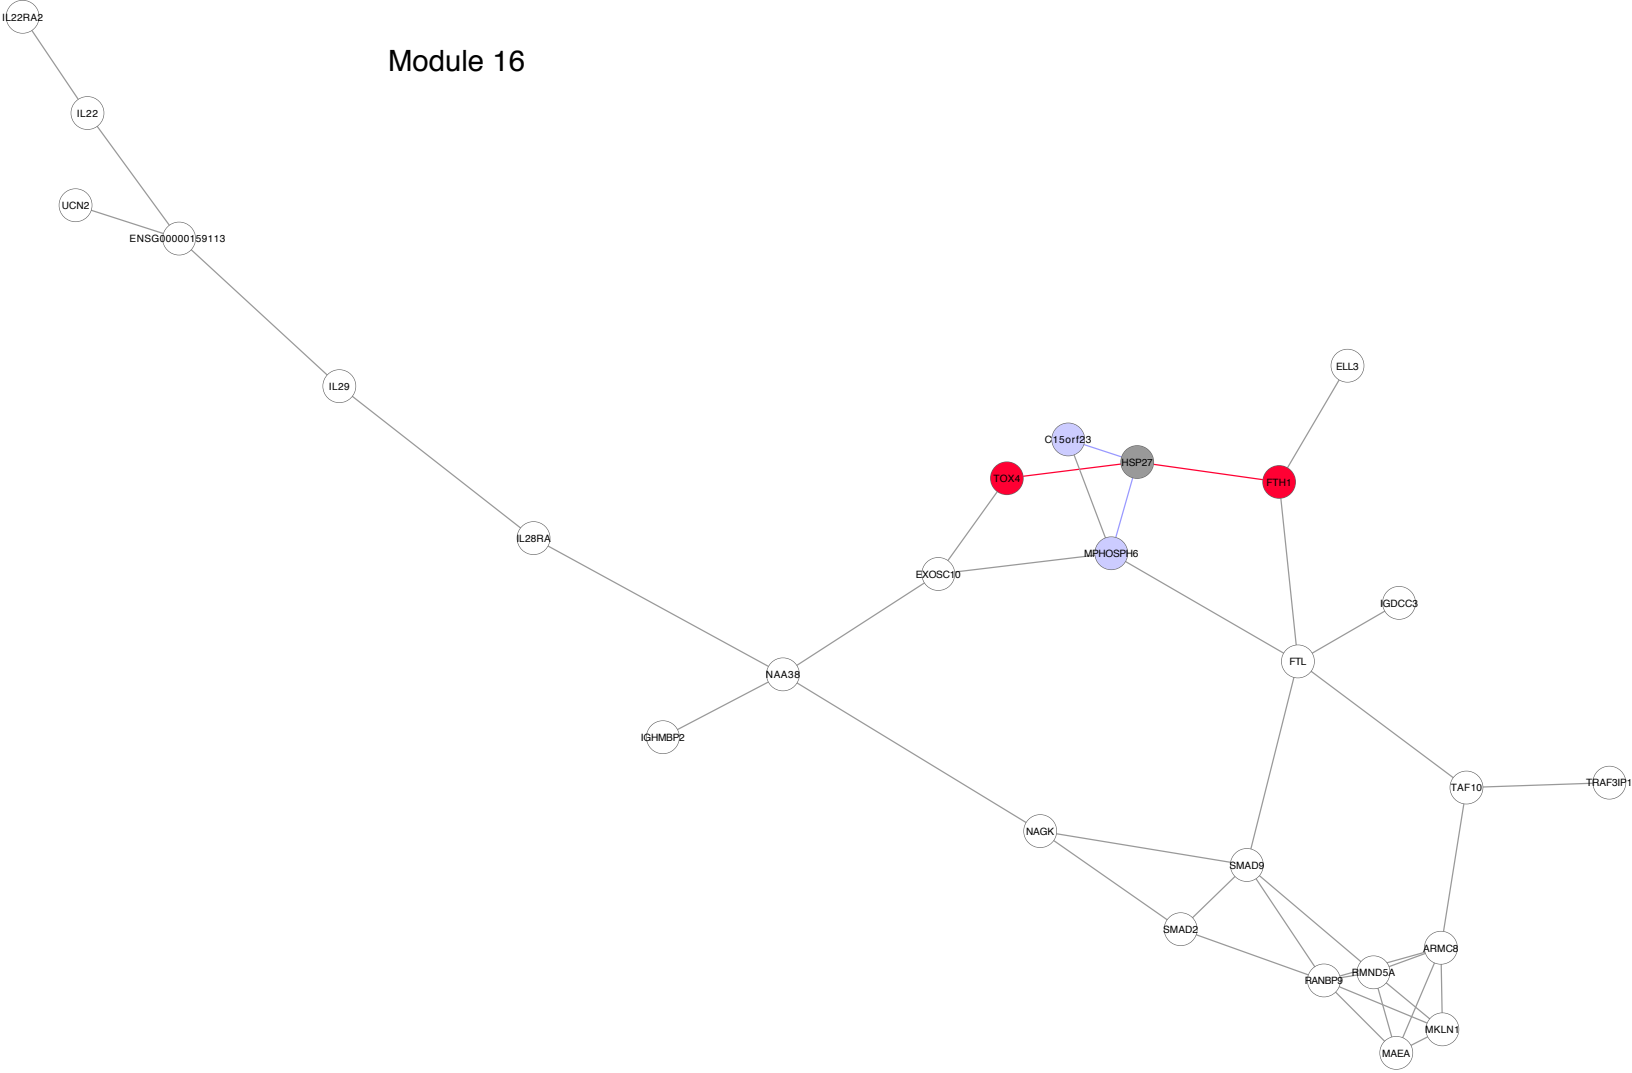



Module 17

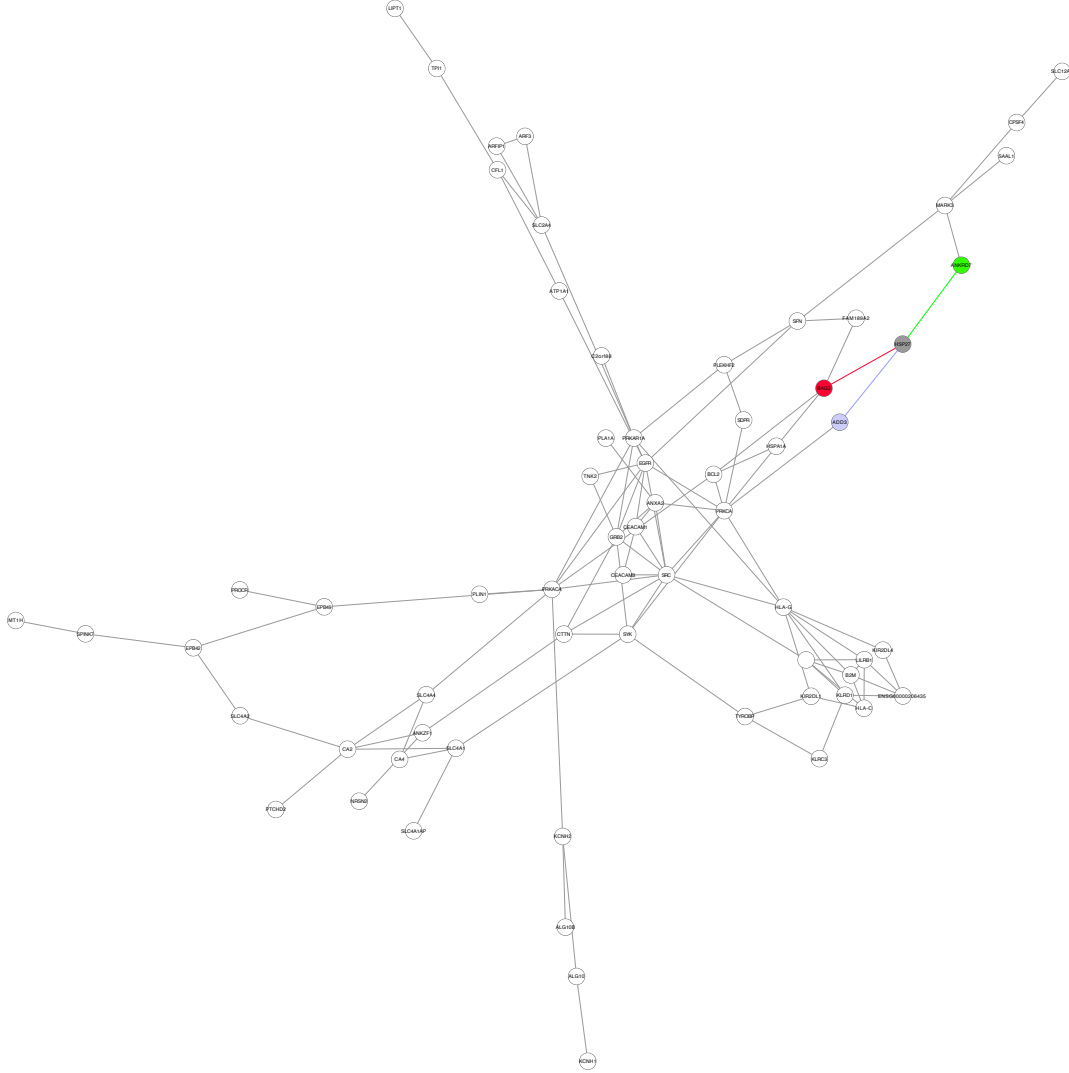

Module 18

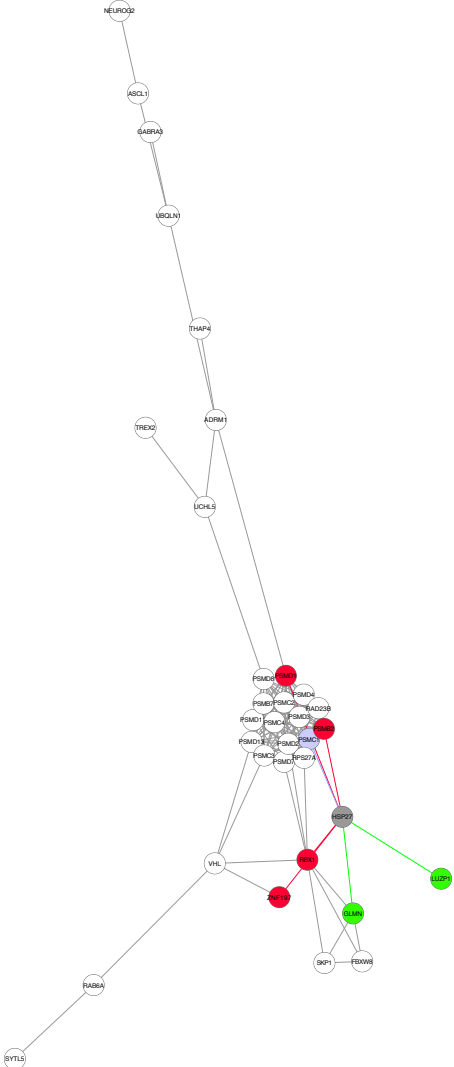



Module 20

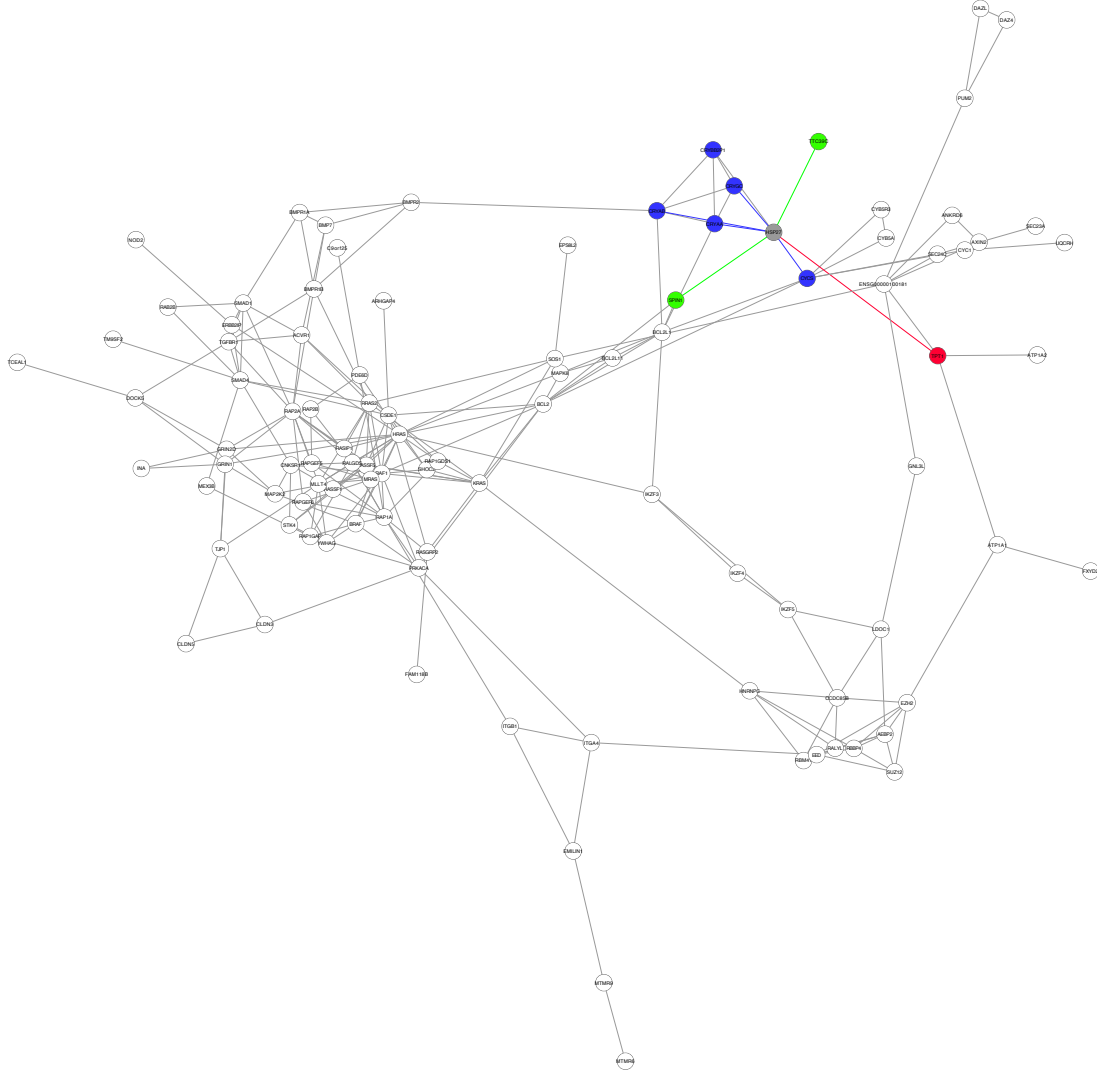

# Module 21

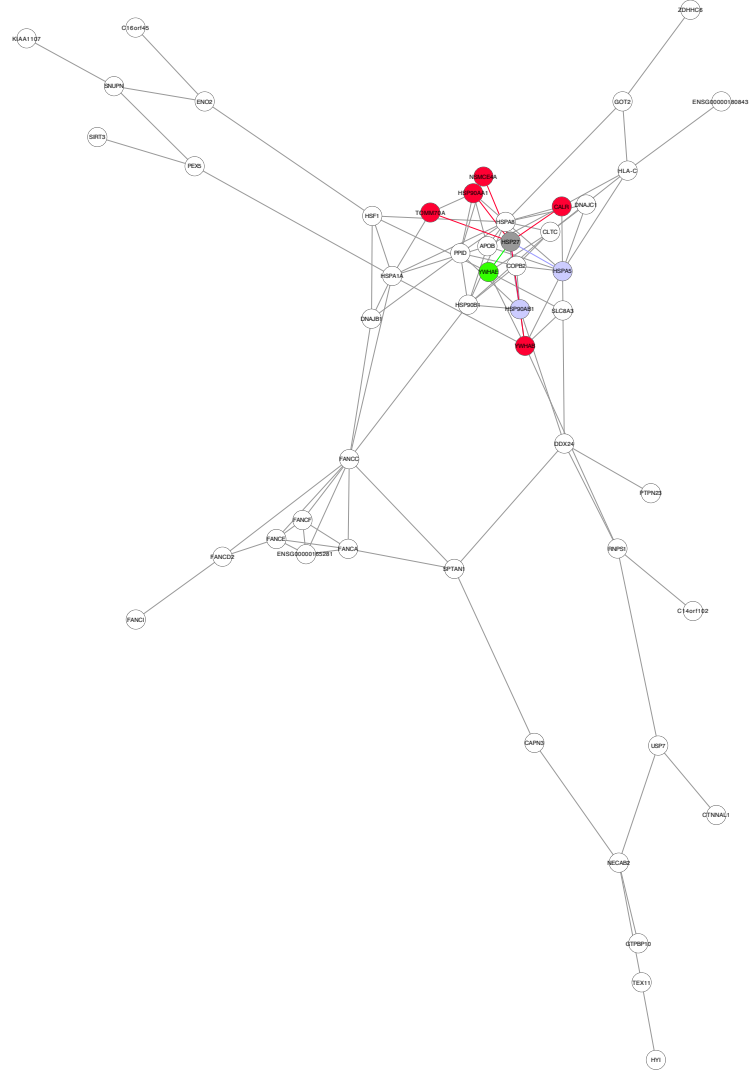

# Module 22

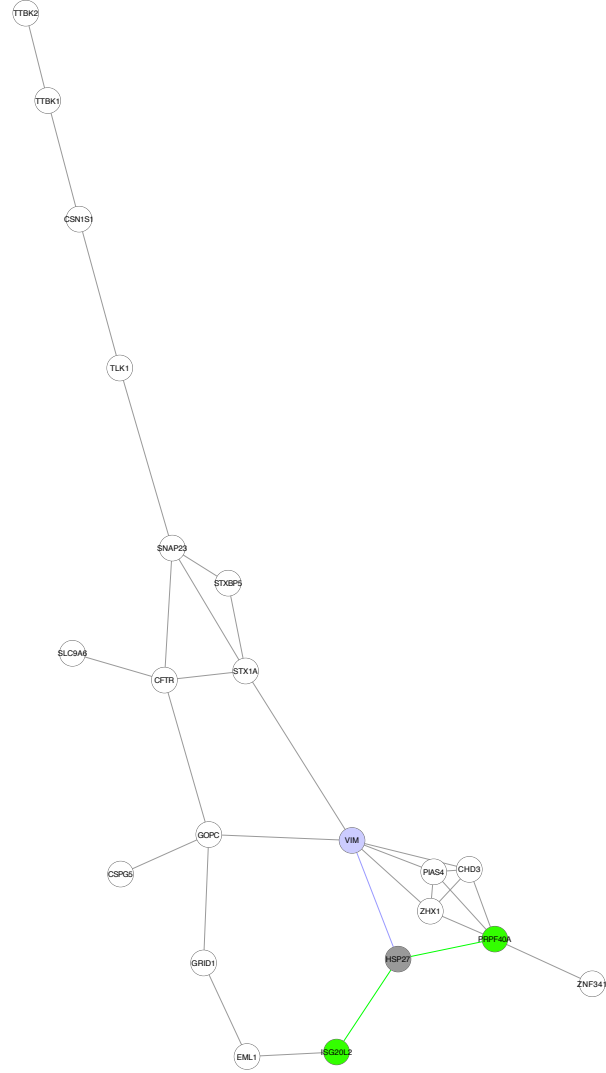

# Module 23

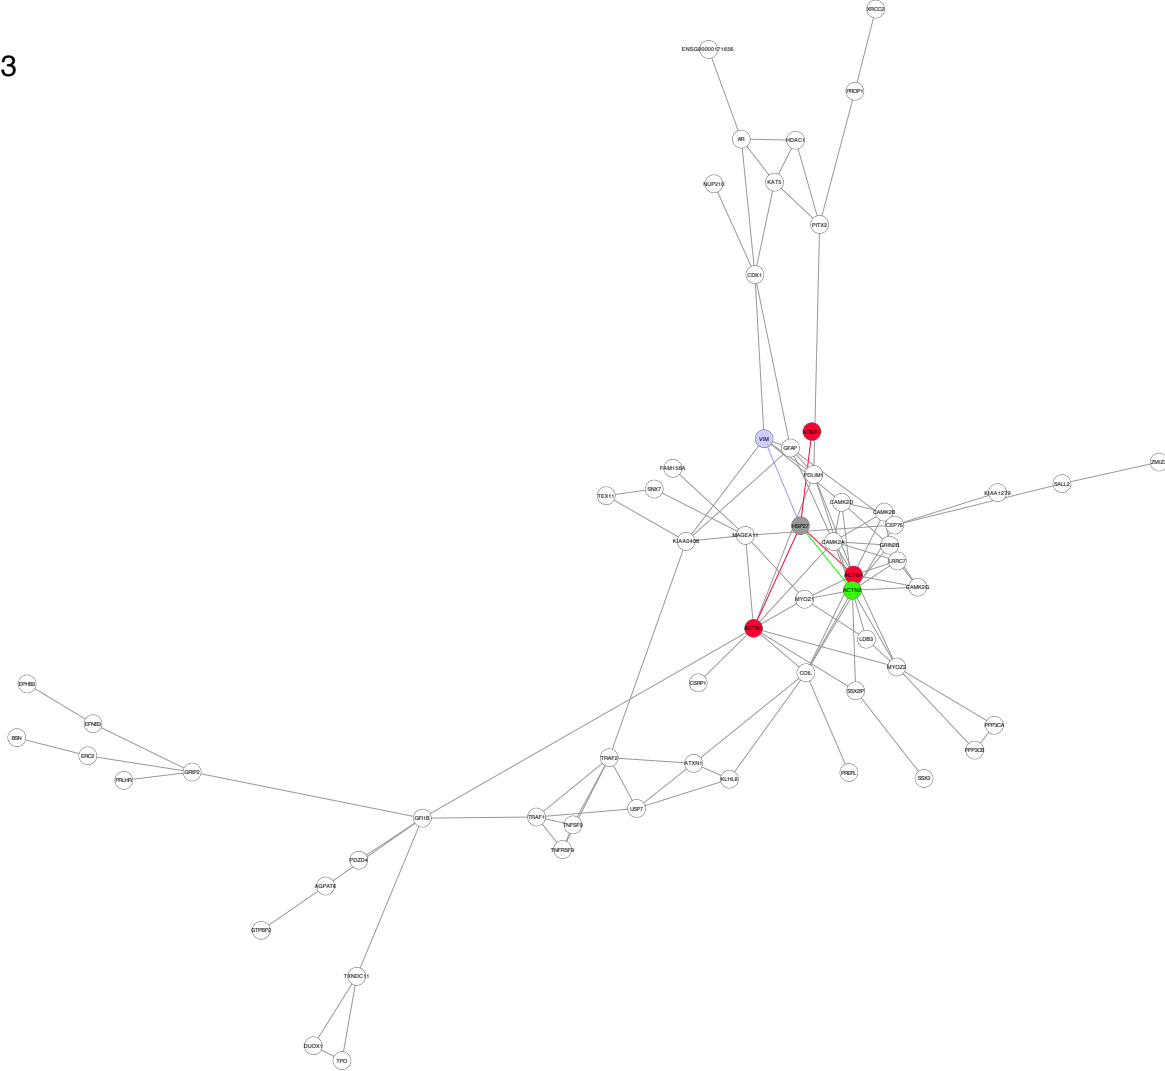

Module 24

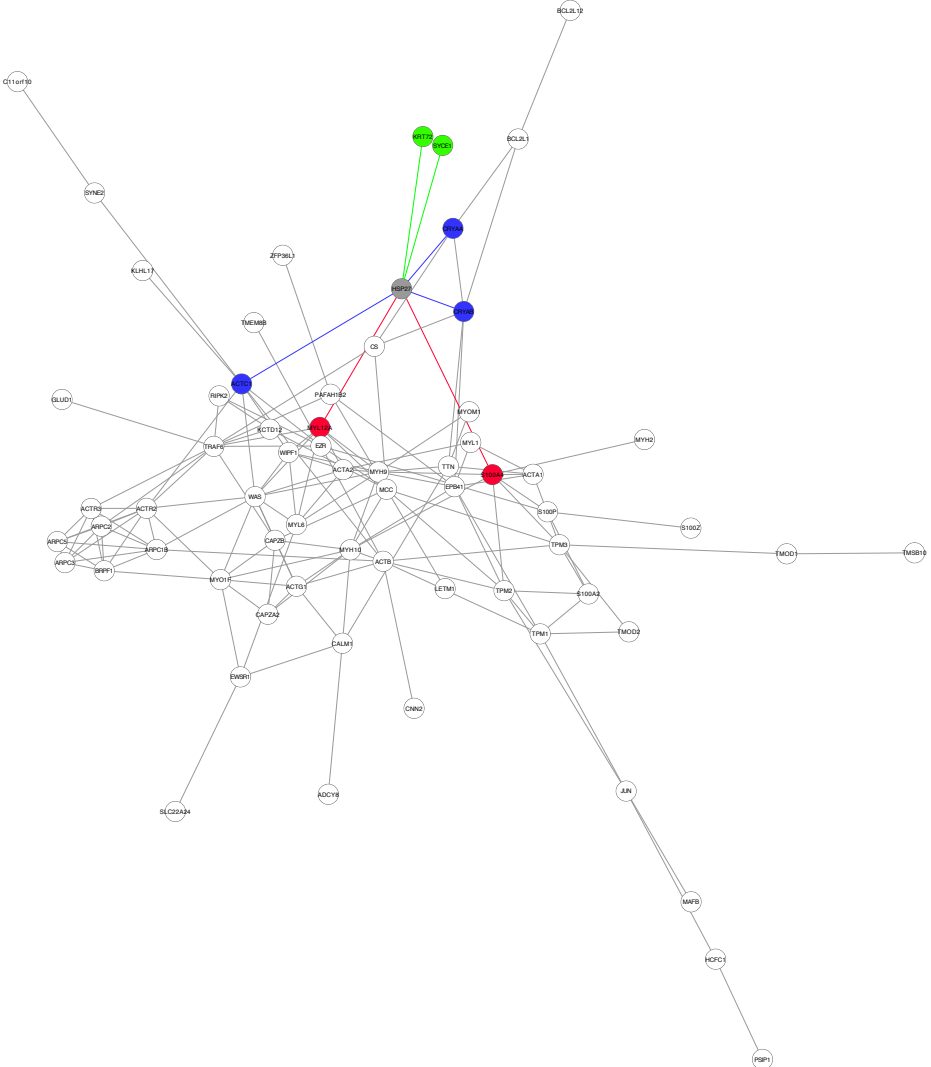



# Module 25

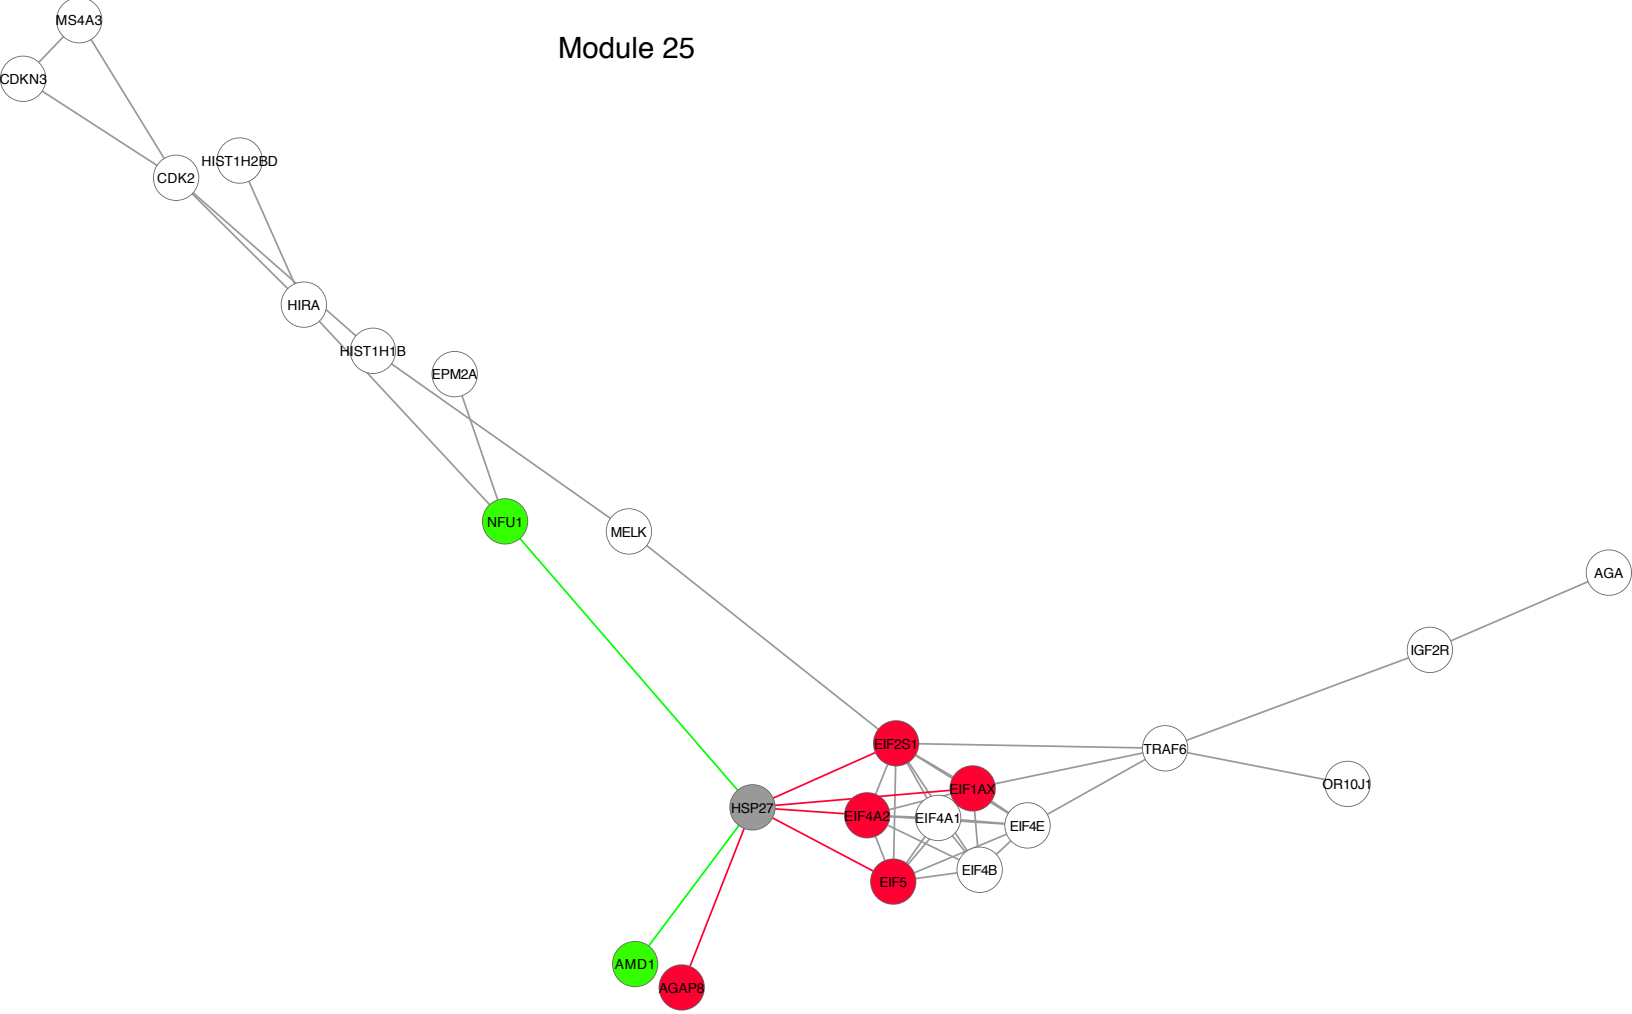

# Module 26

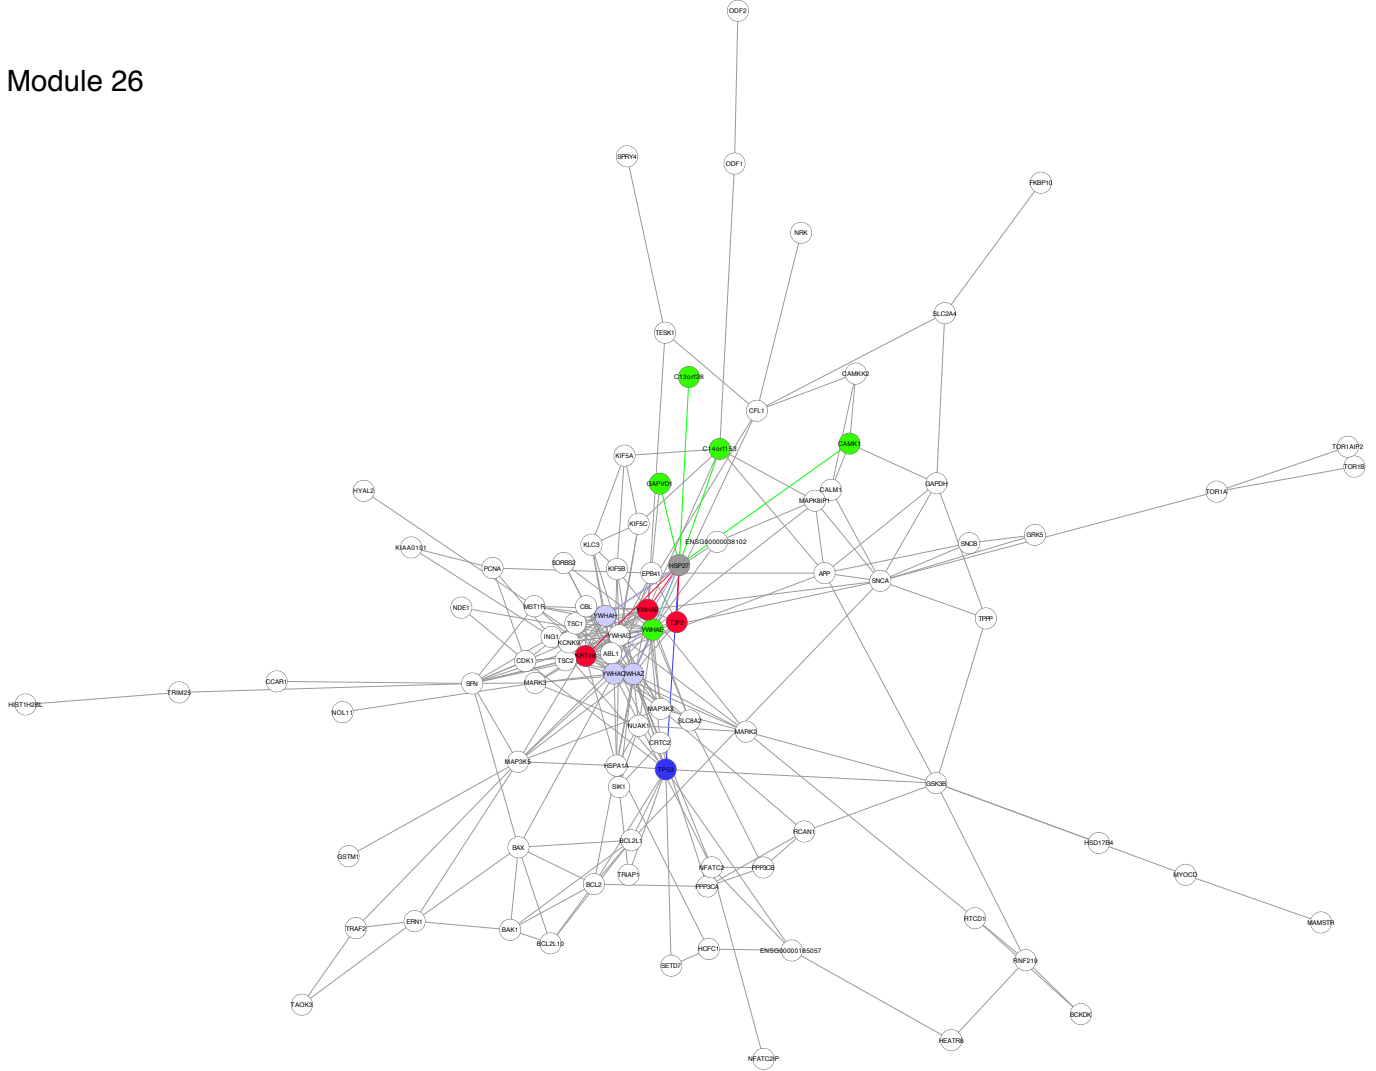

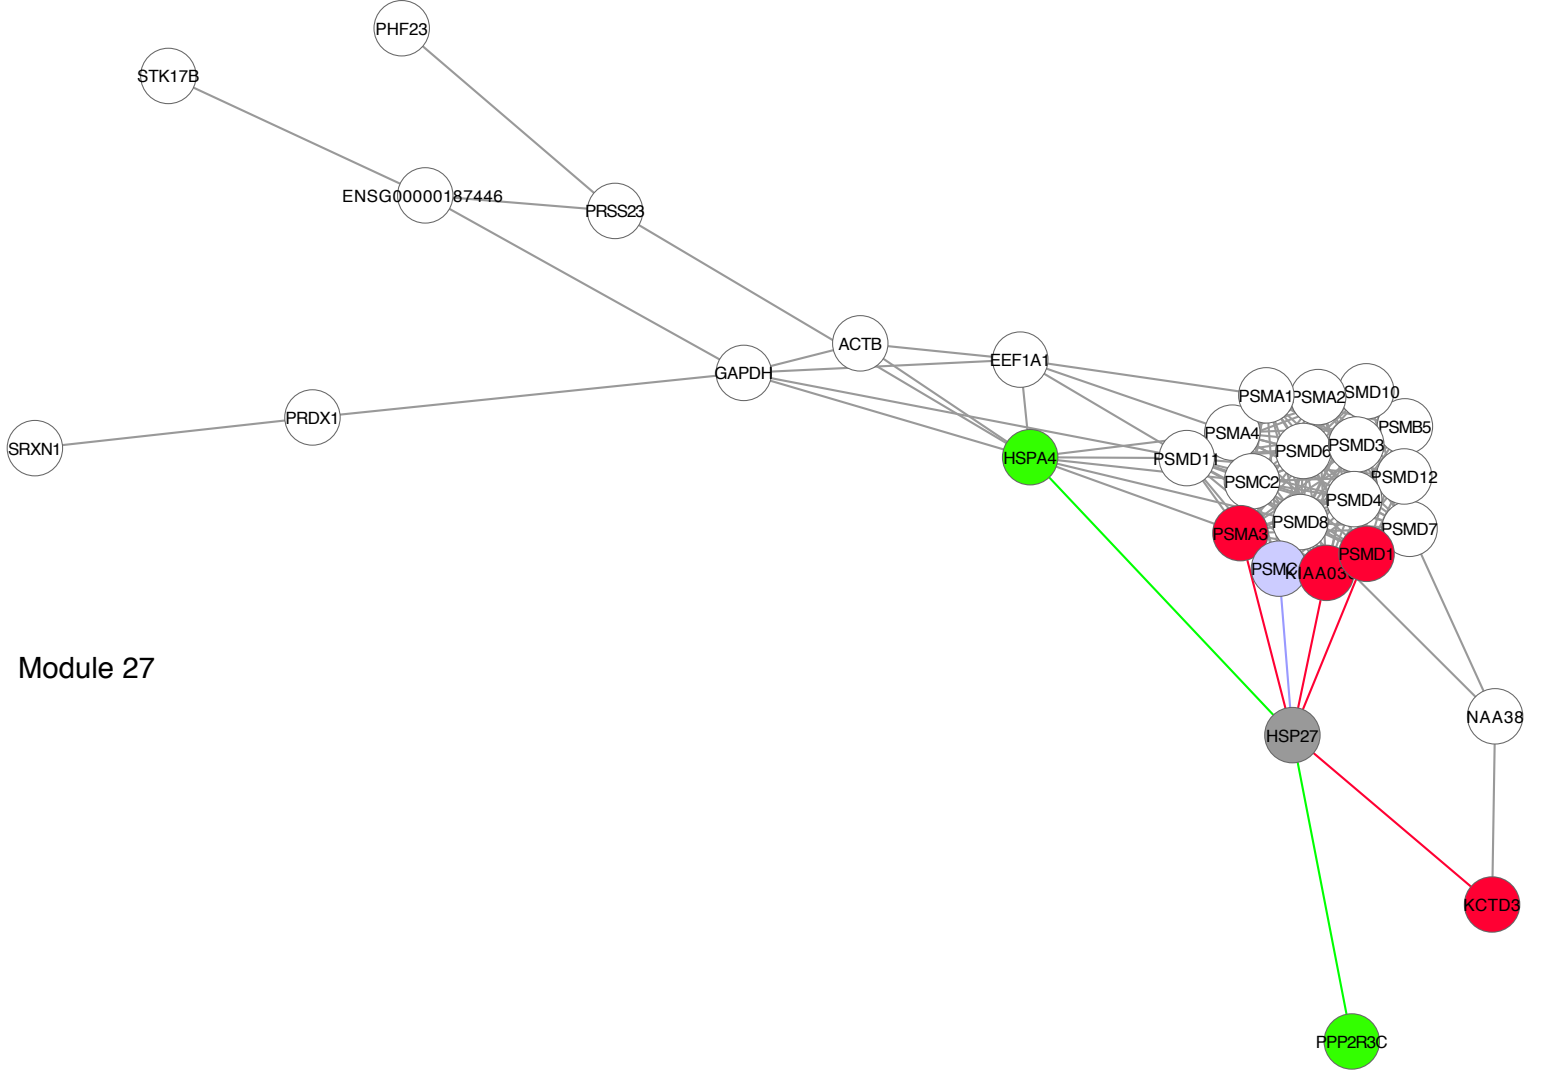



Module 29

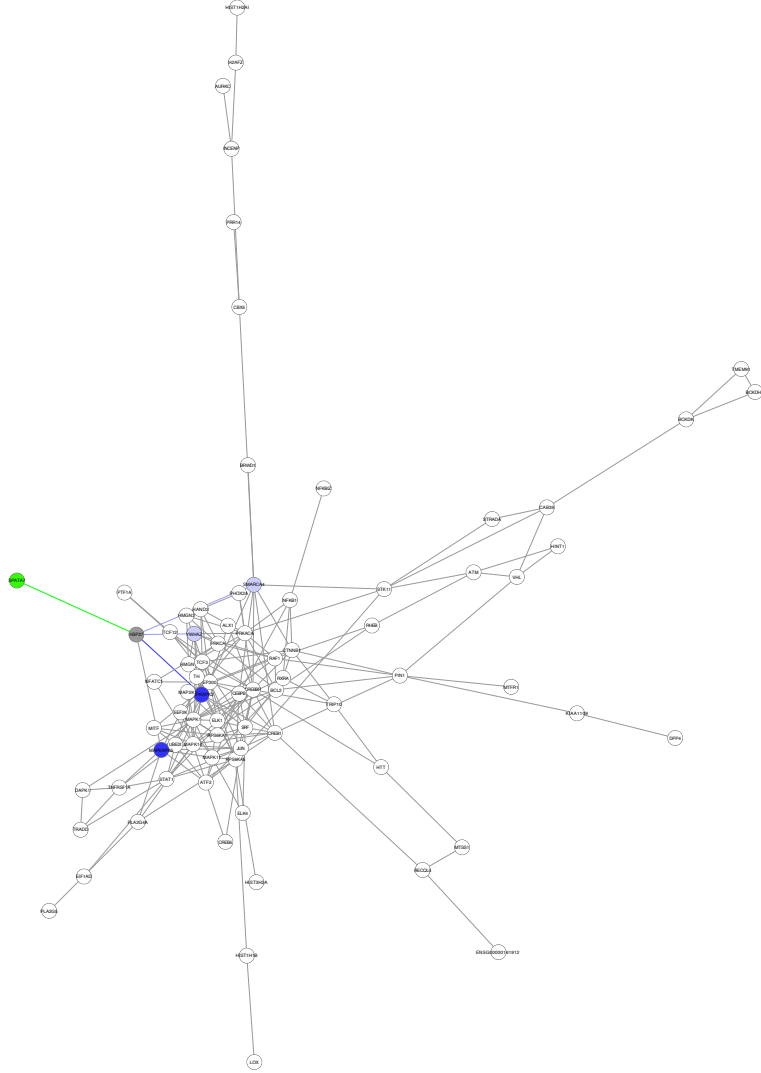

Module 30

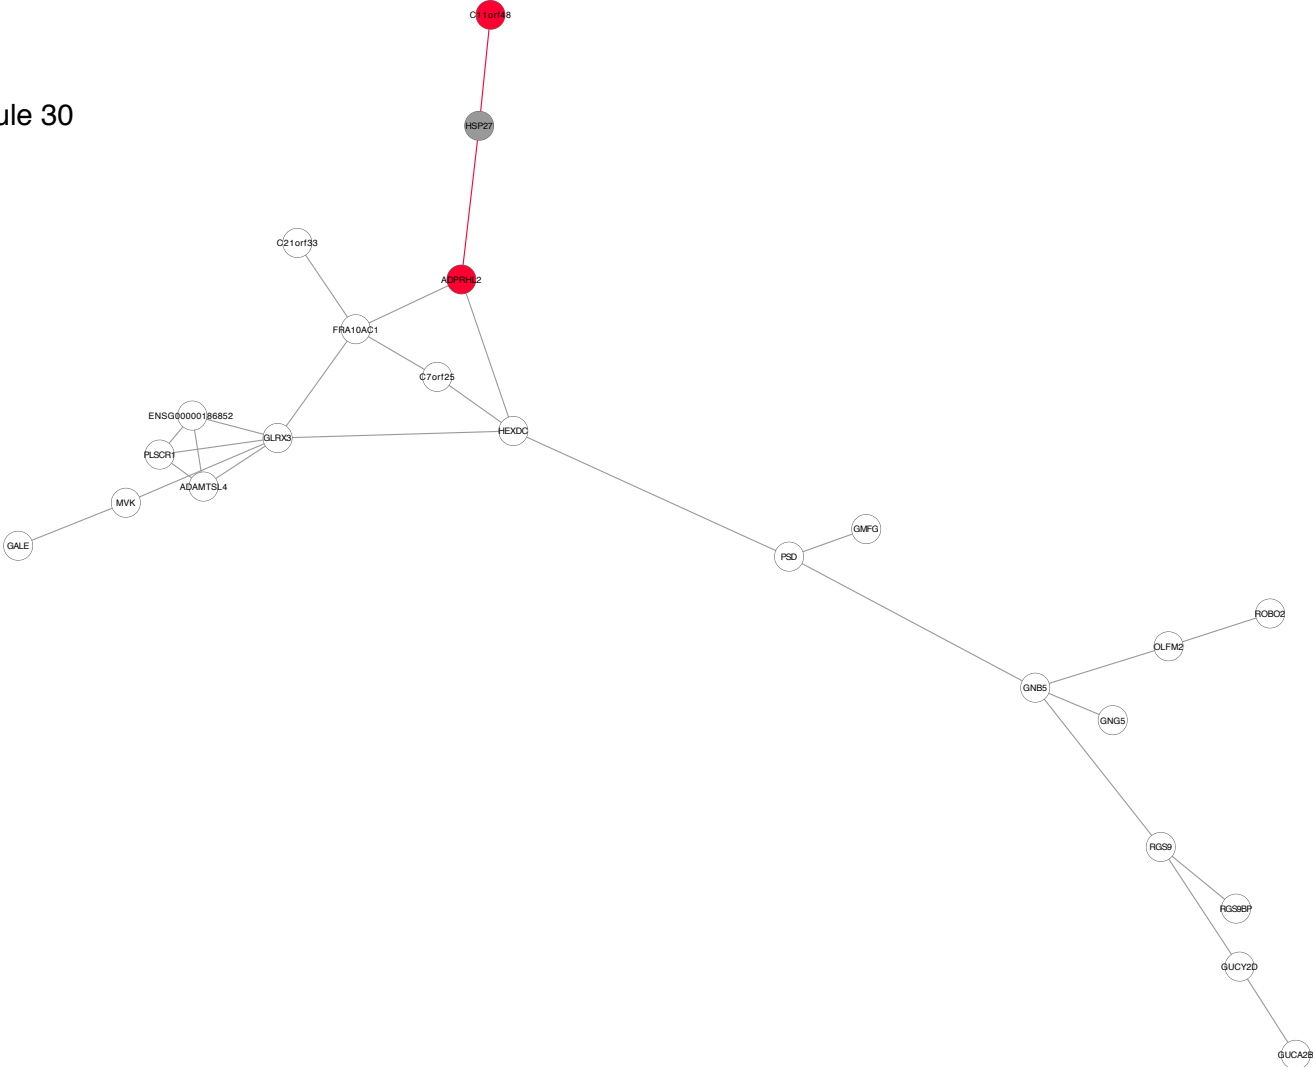

# Module 31

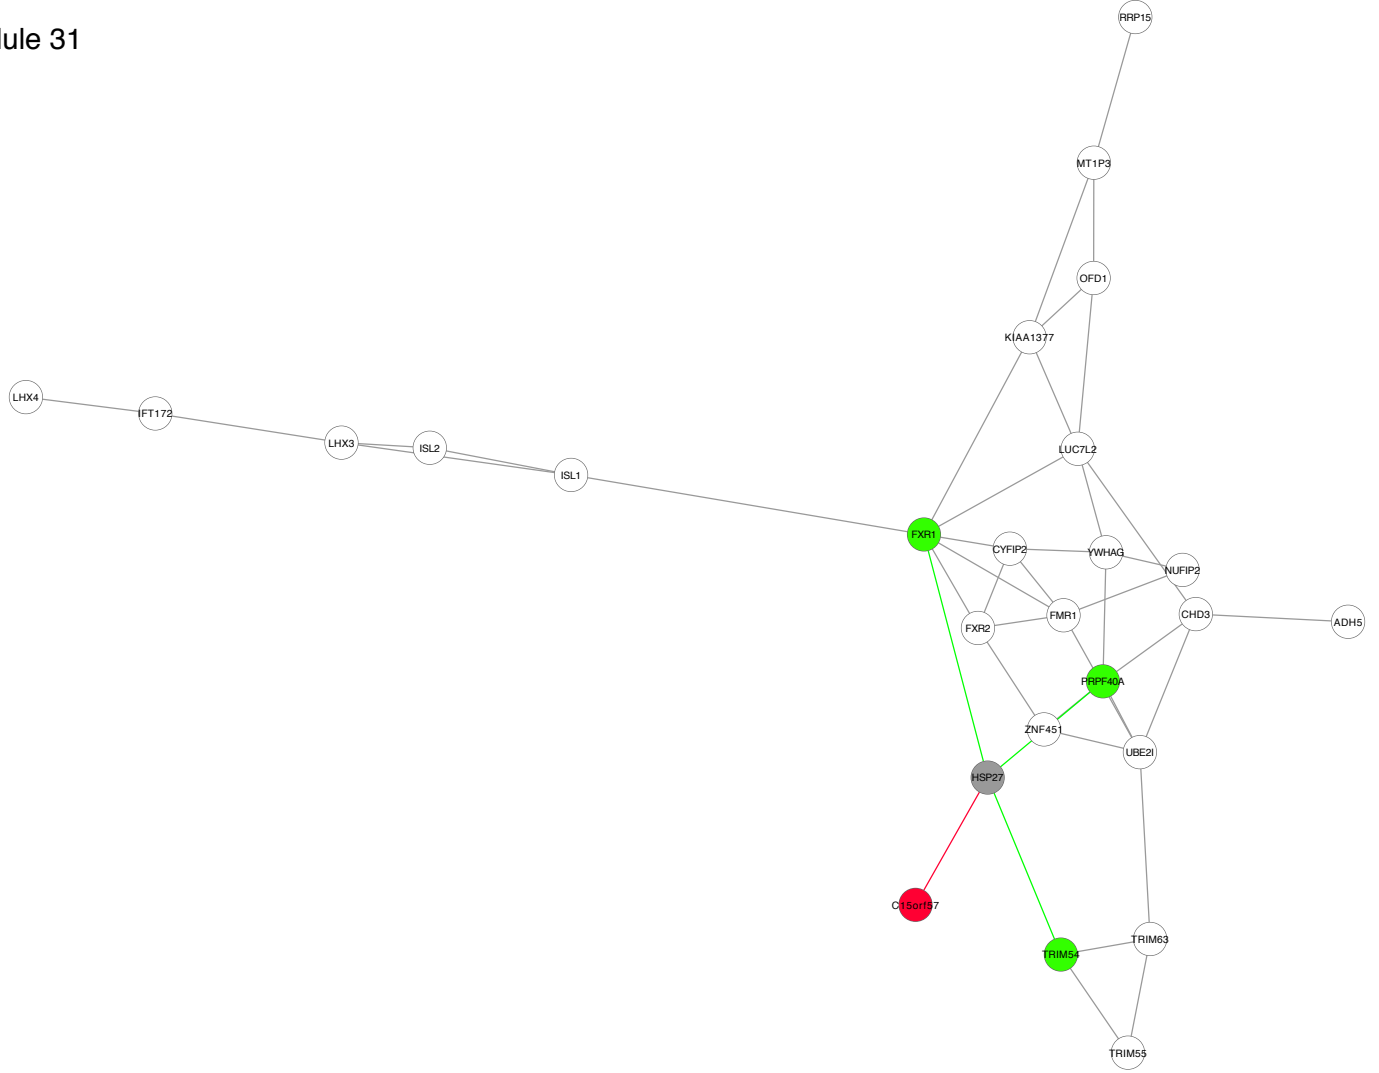

# Module 32

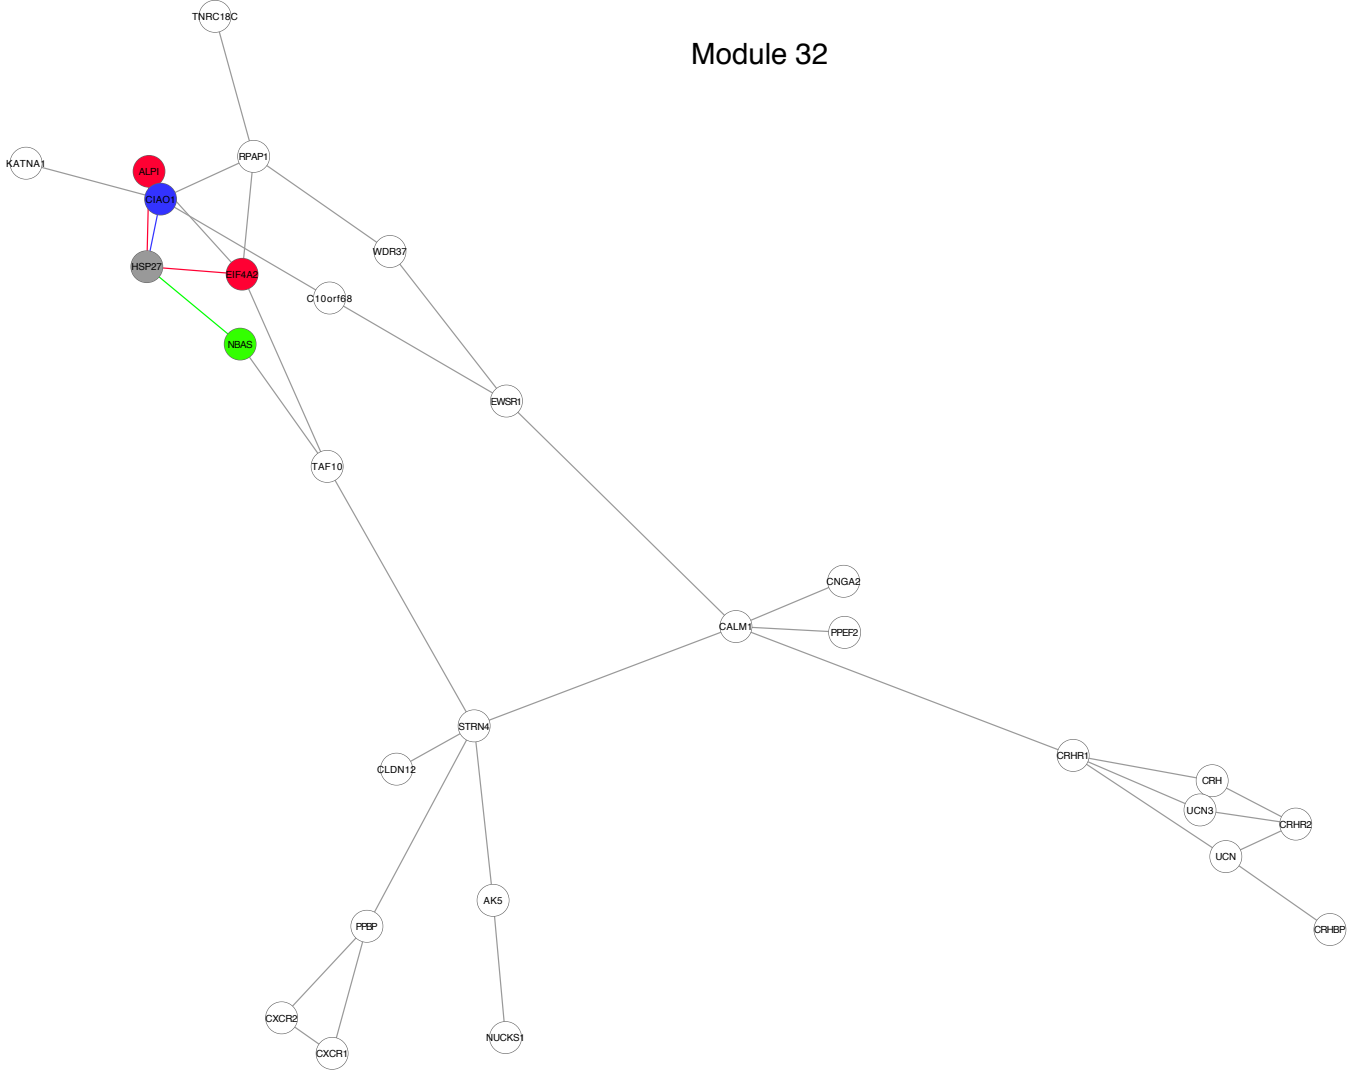



Module 33

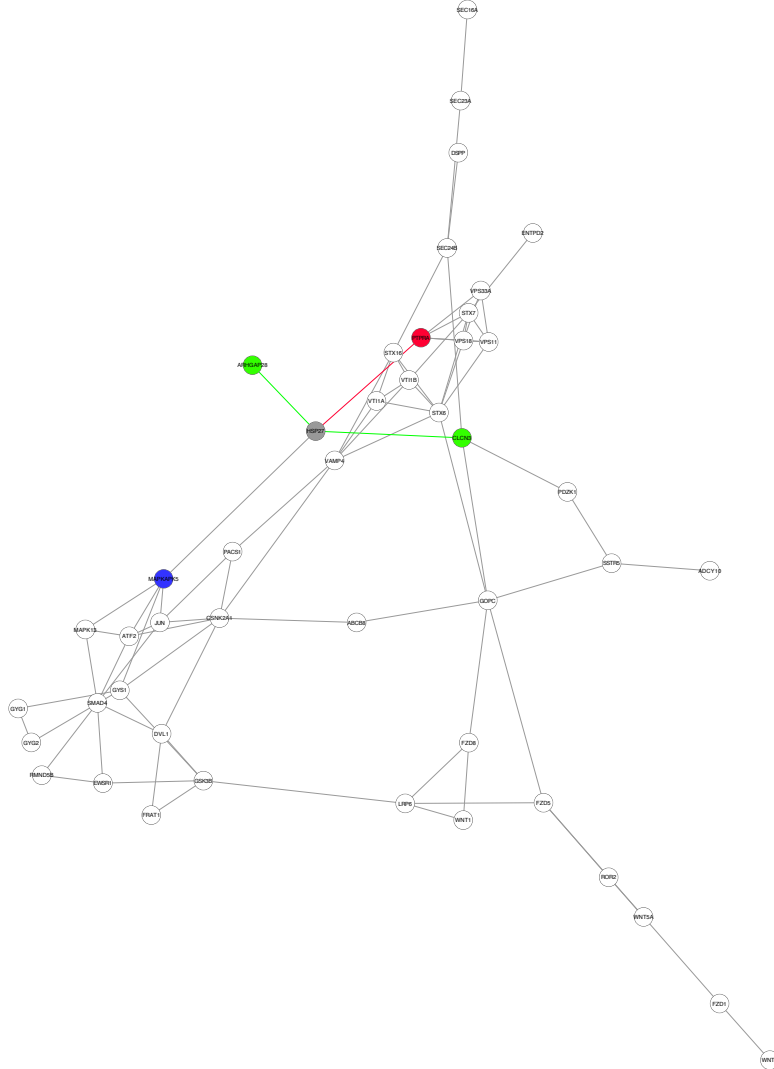

Module 34

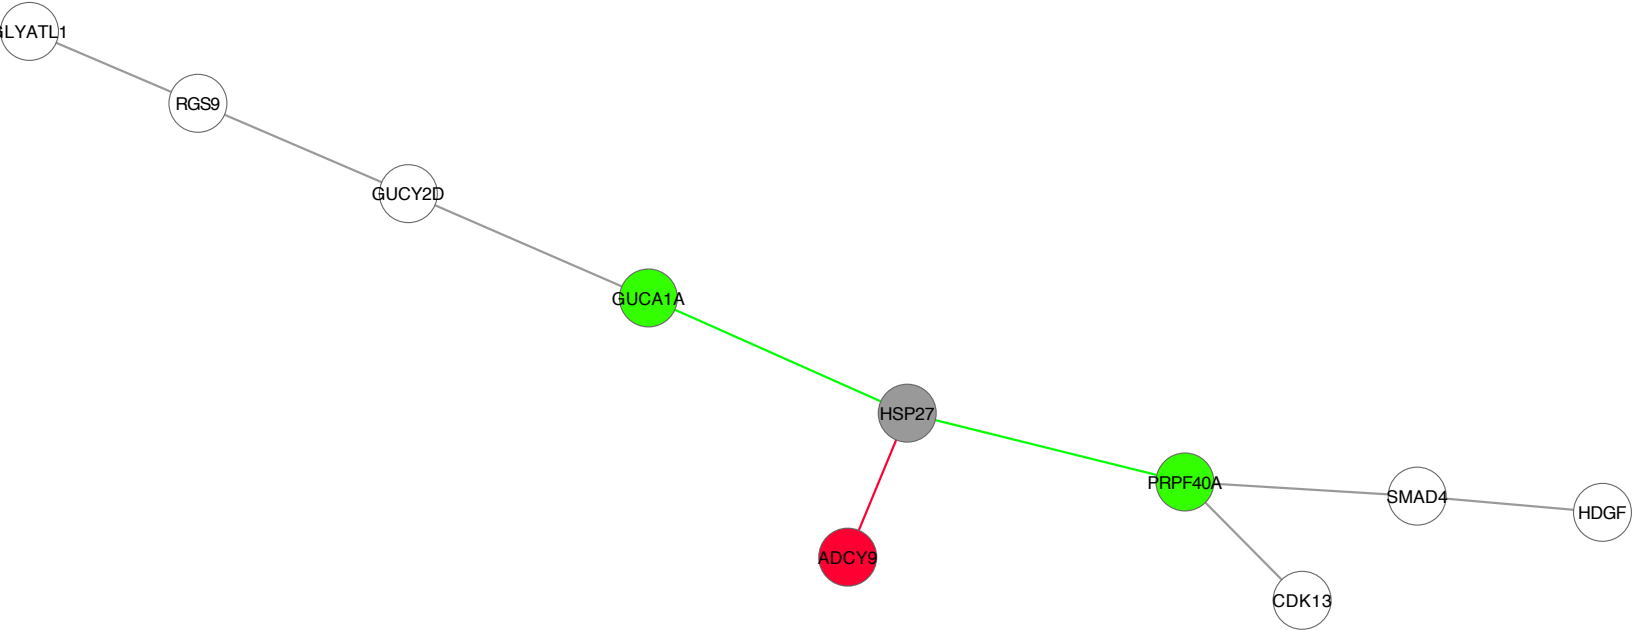

Module 35

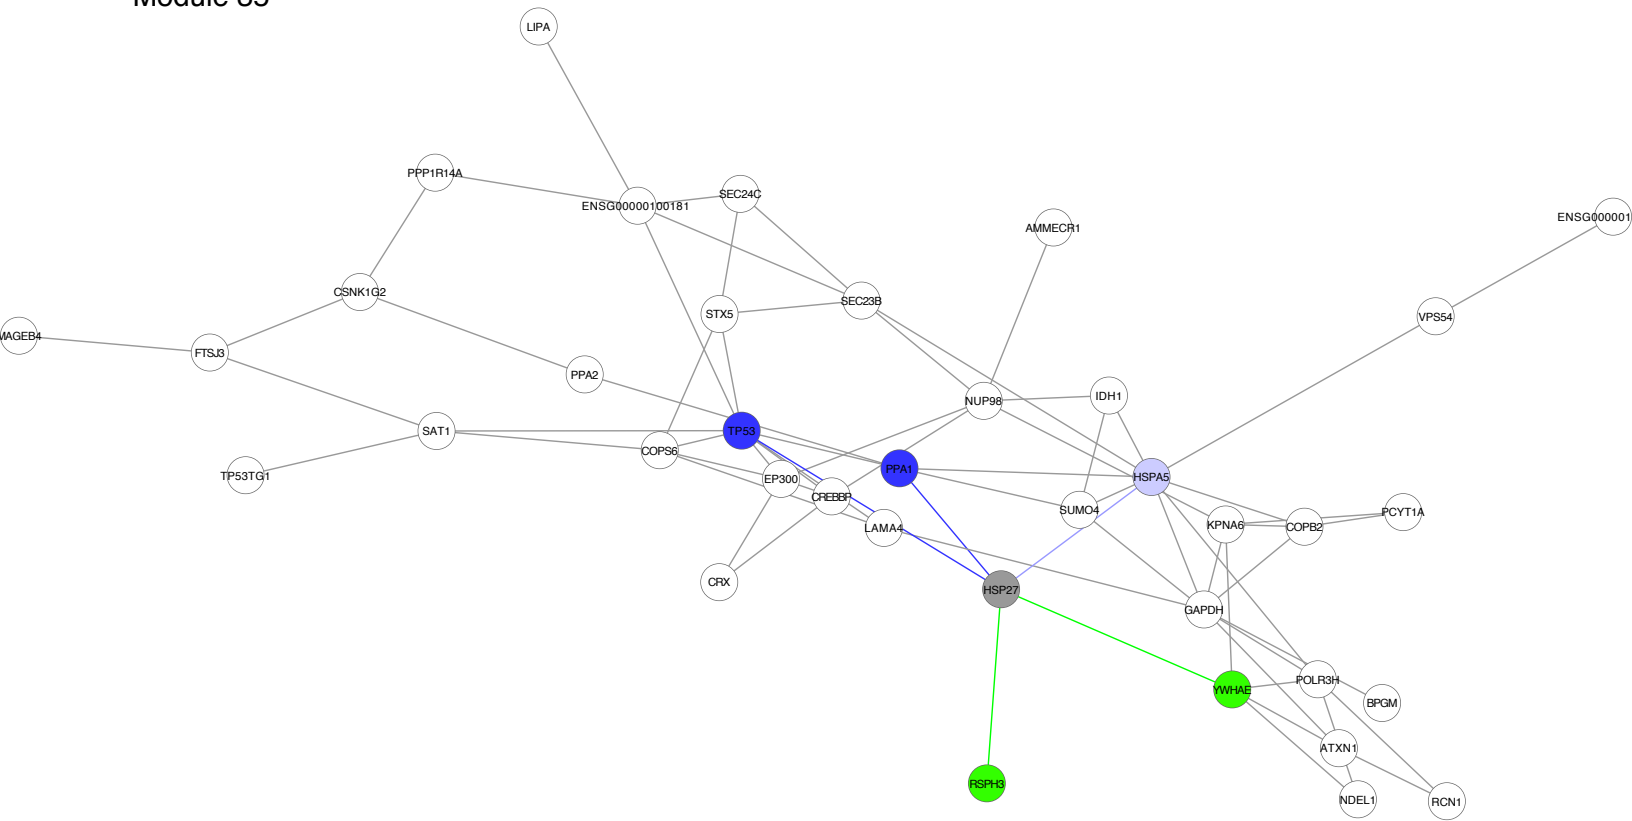

# Module 36

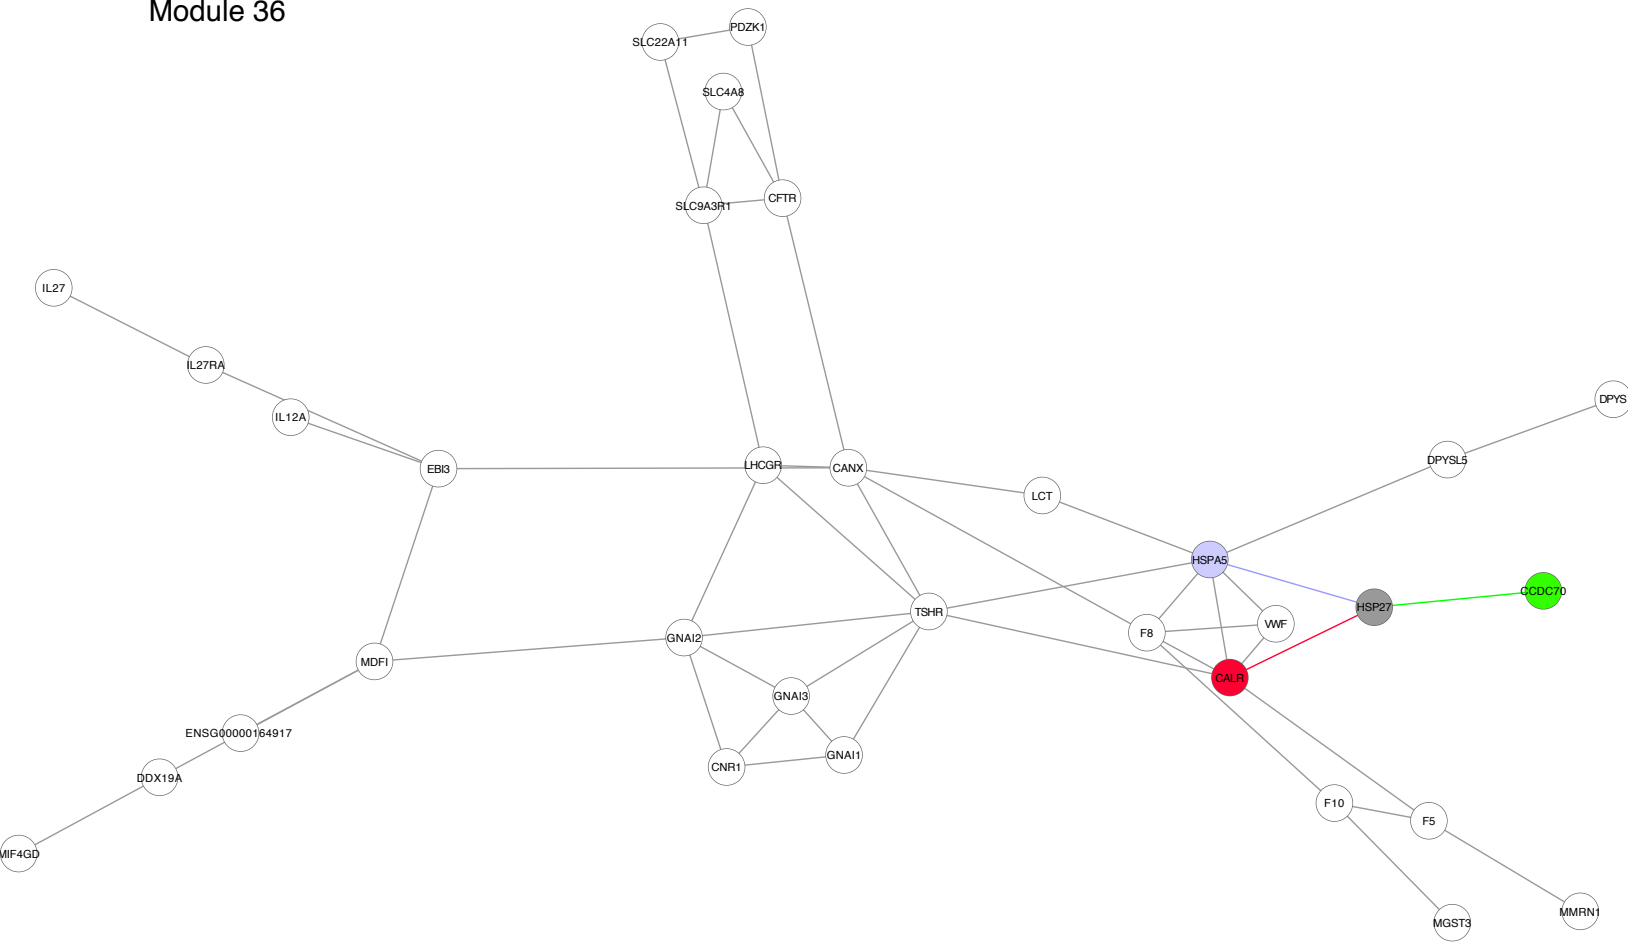

Module 37

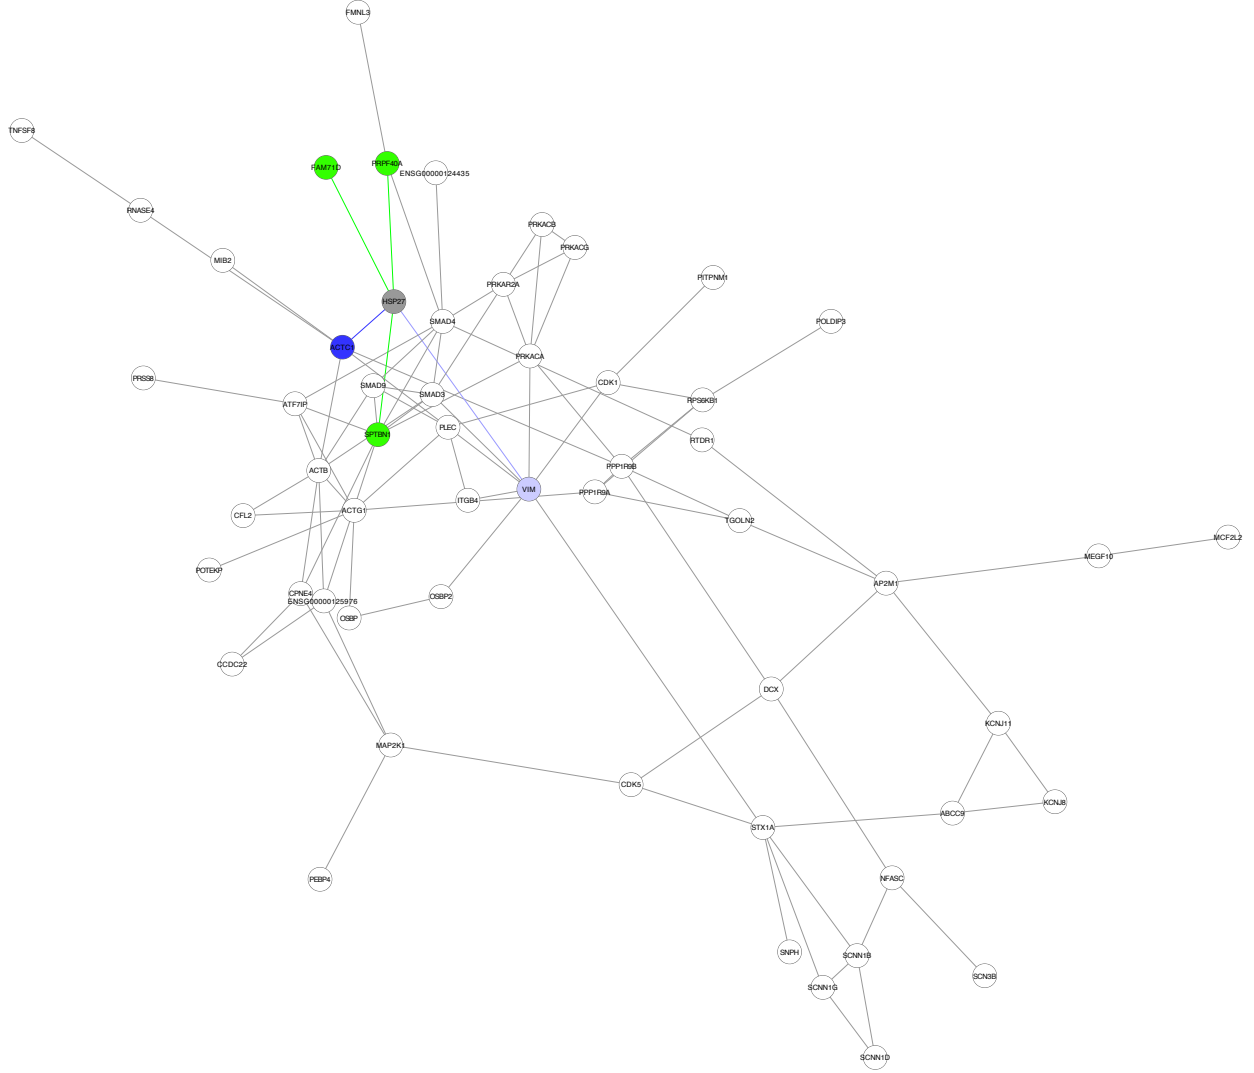

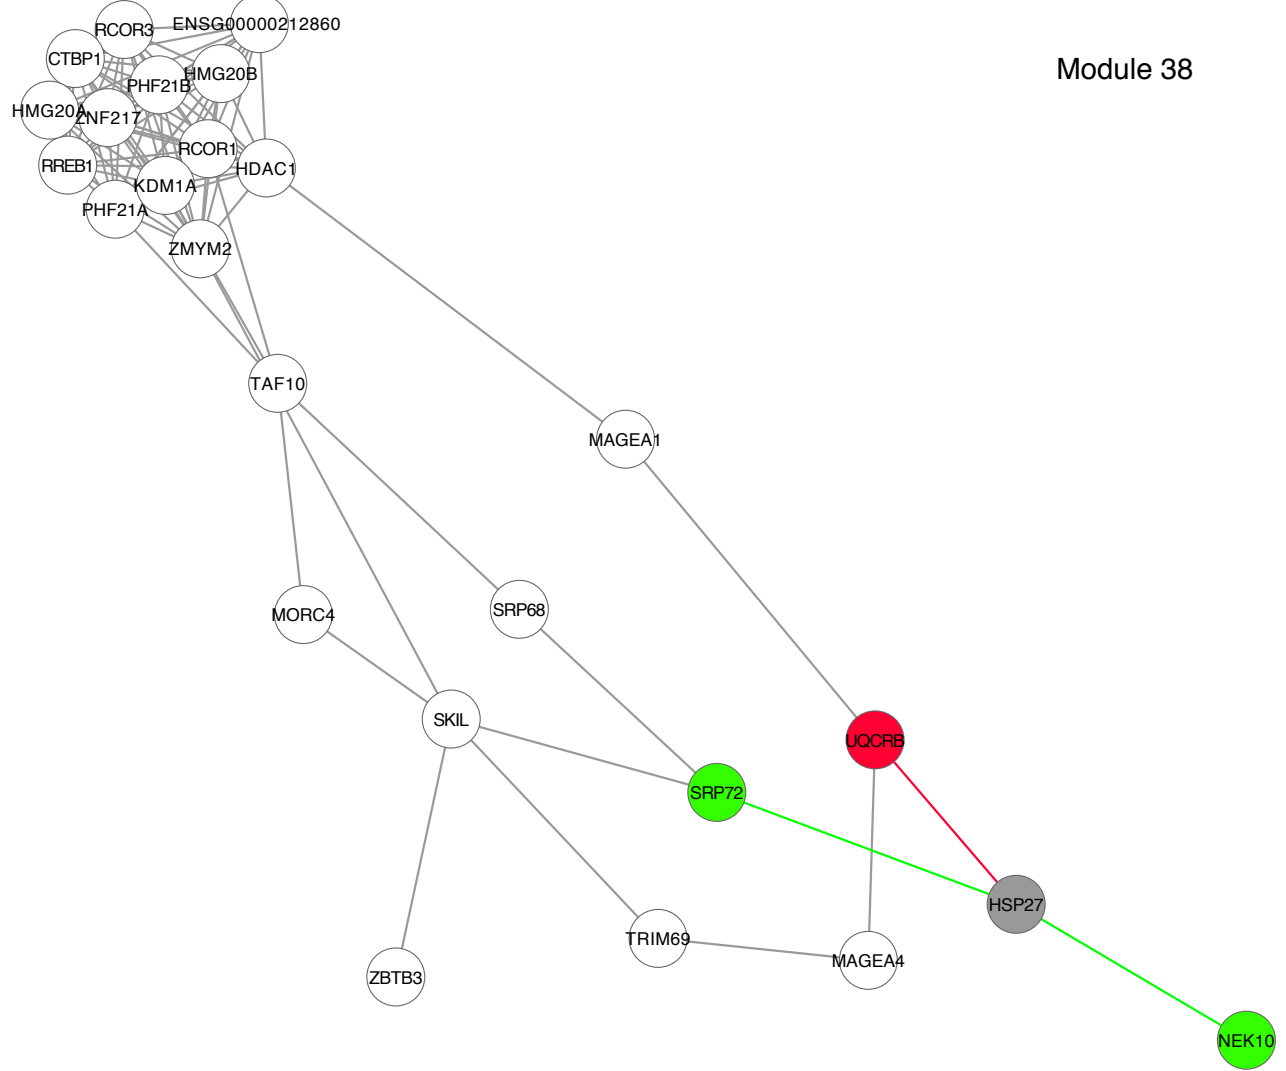

# Module 39

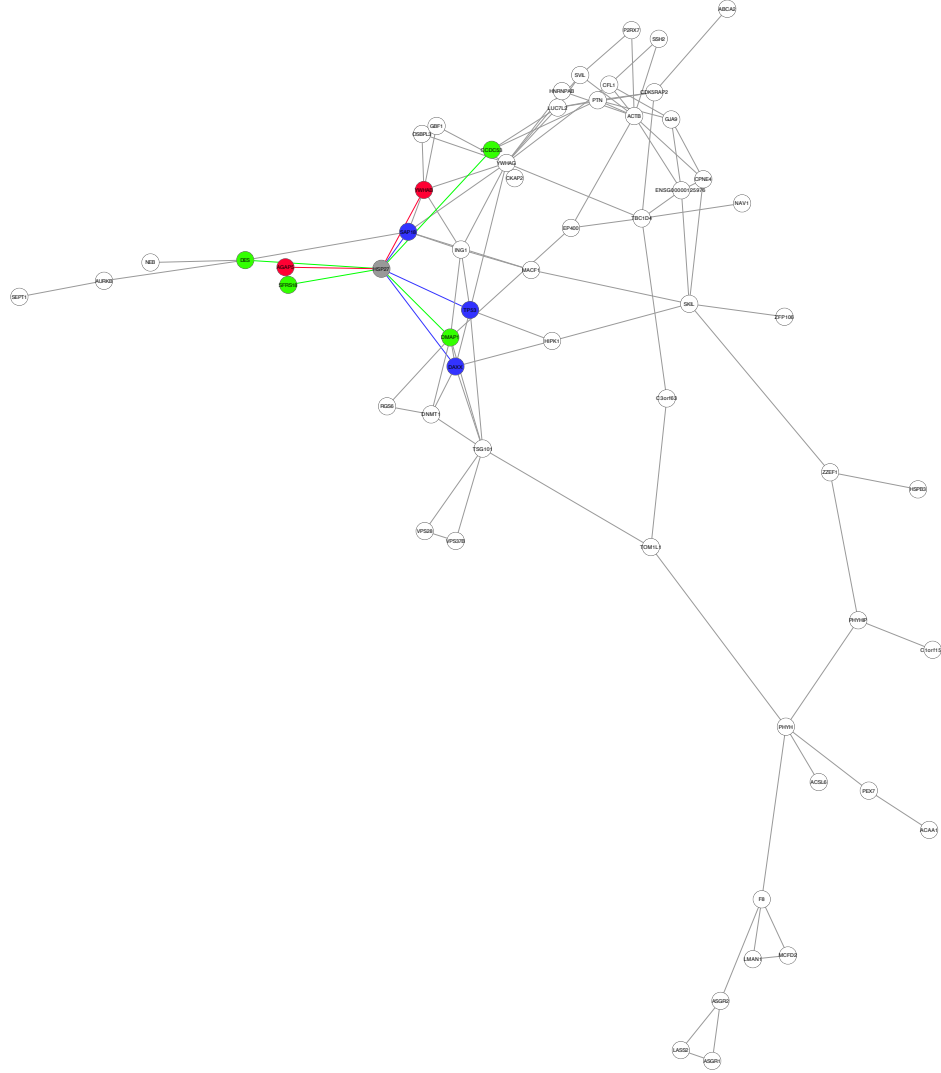

Module 40

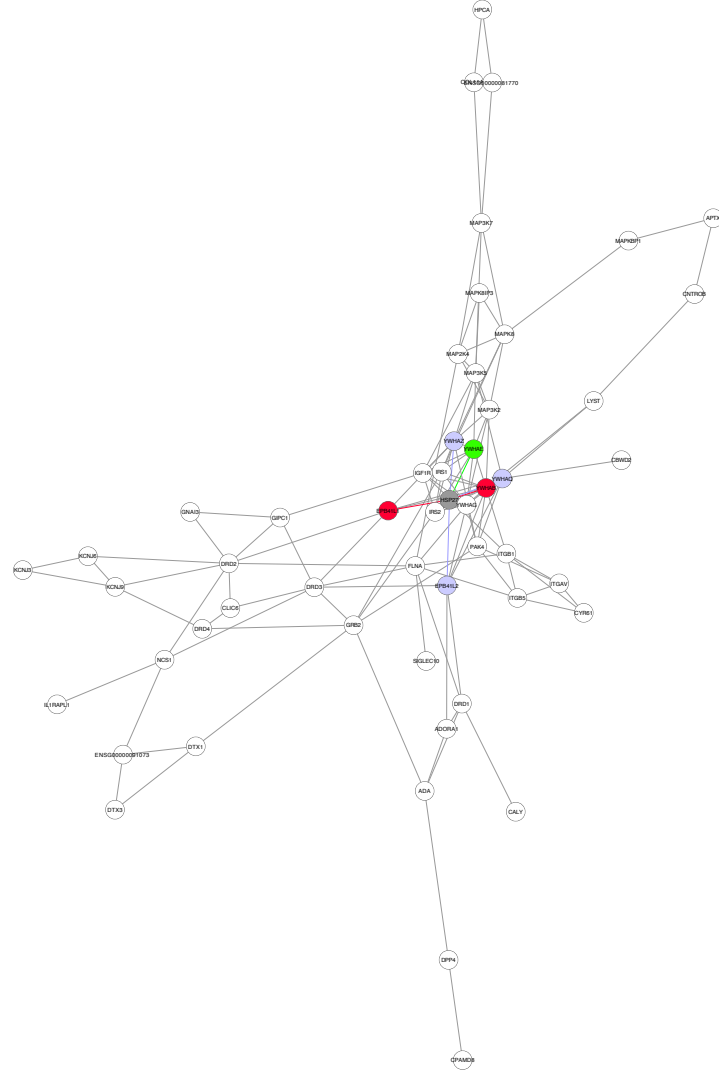



# Module 41

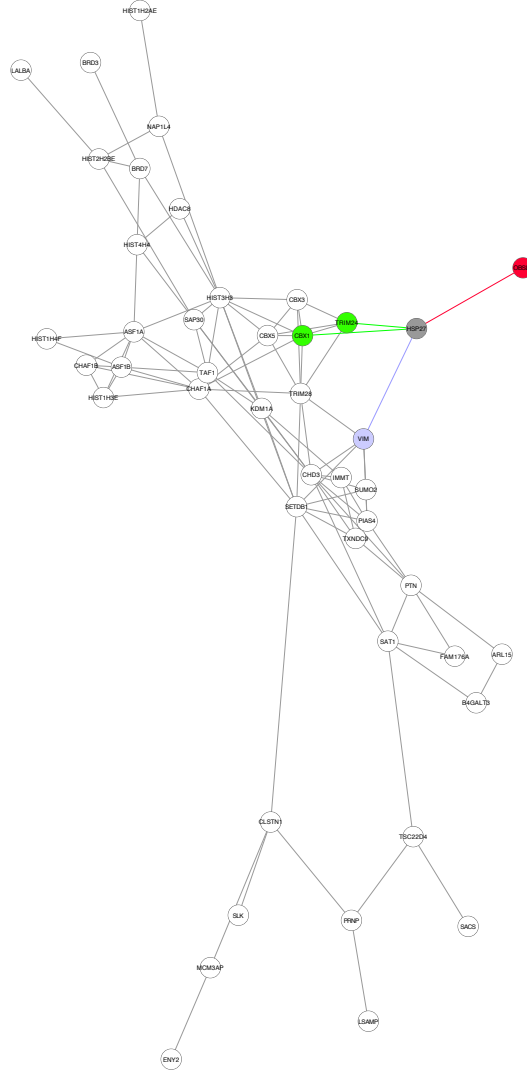

# Module 42

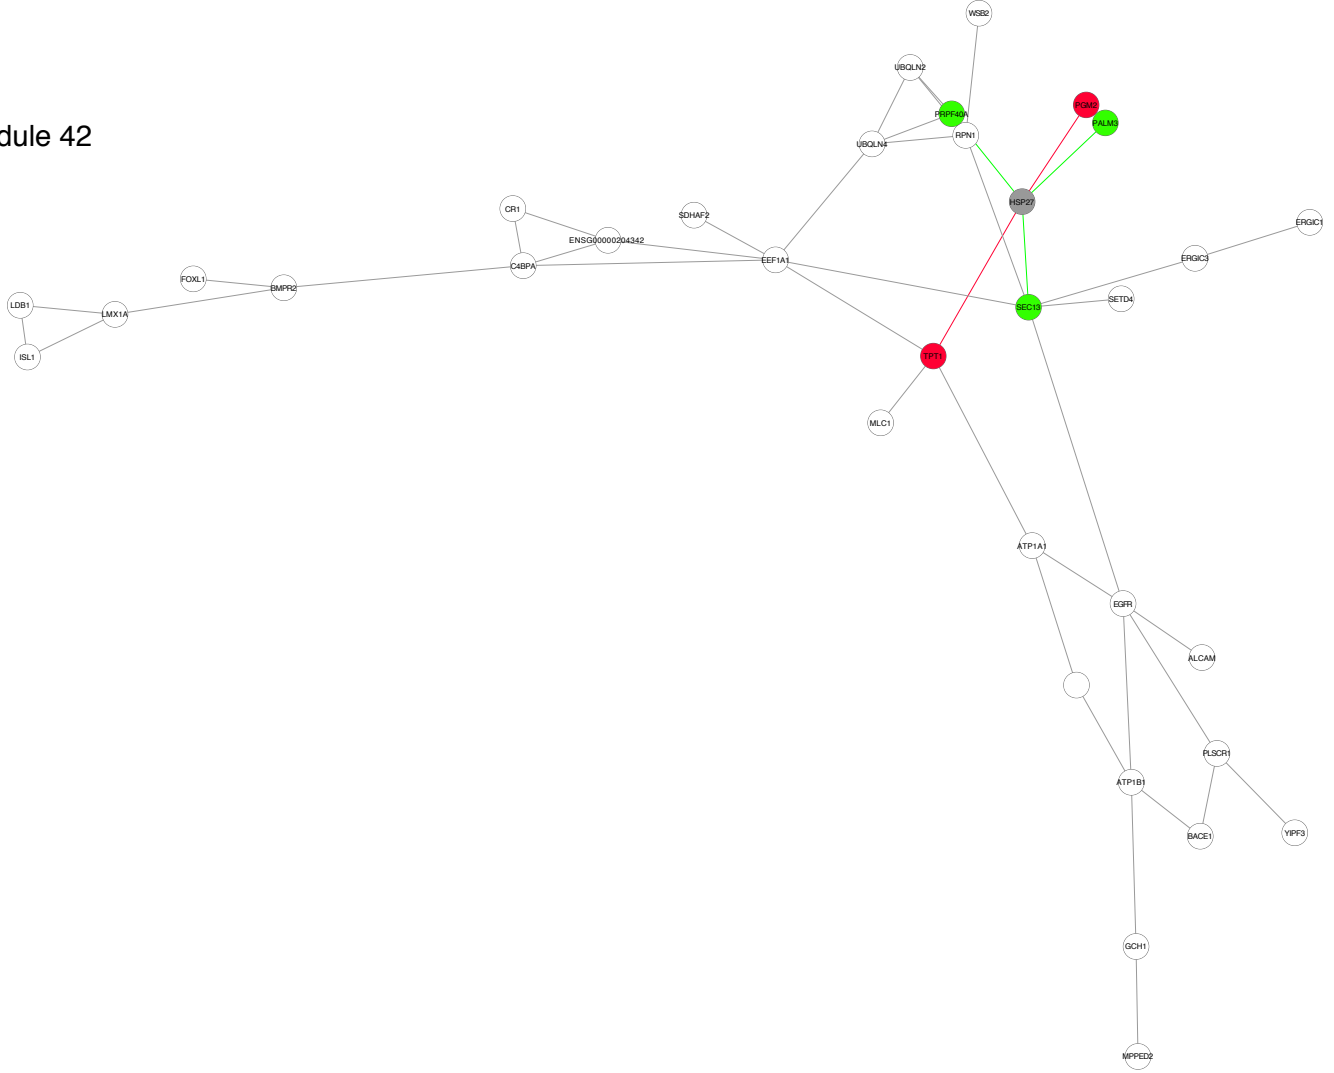

# Module 43

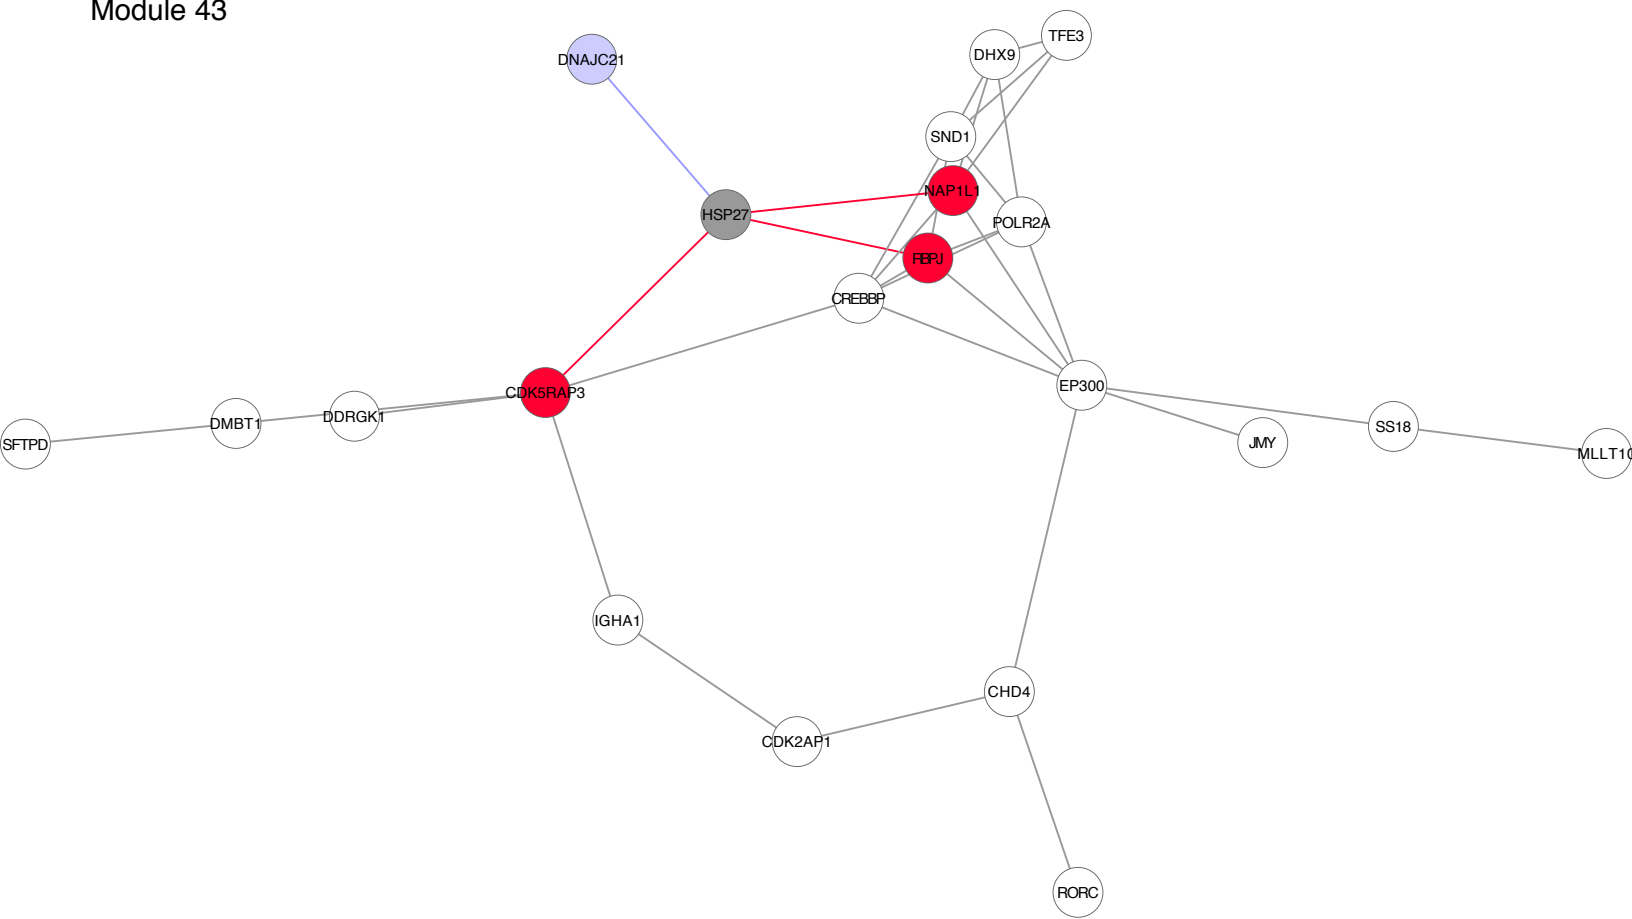

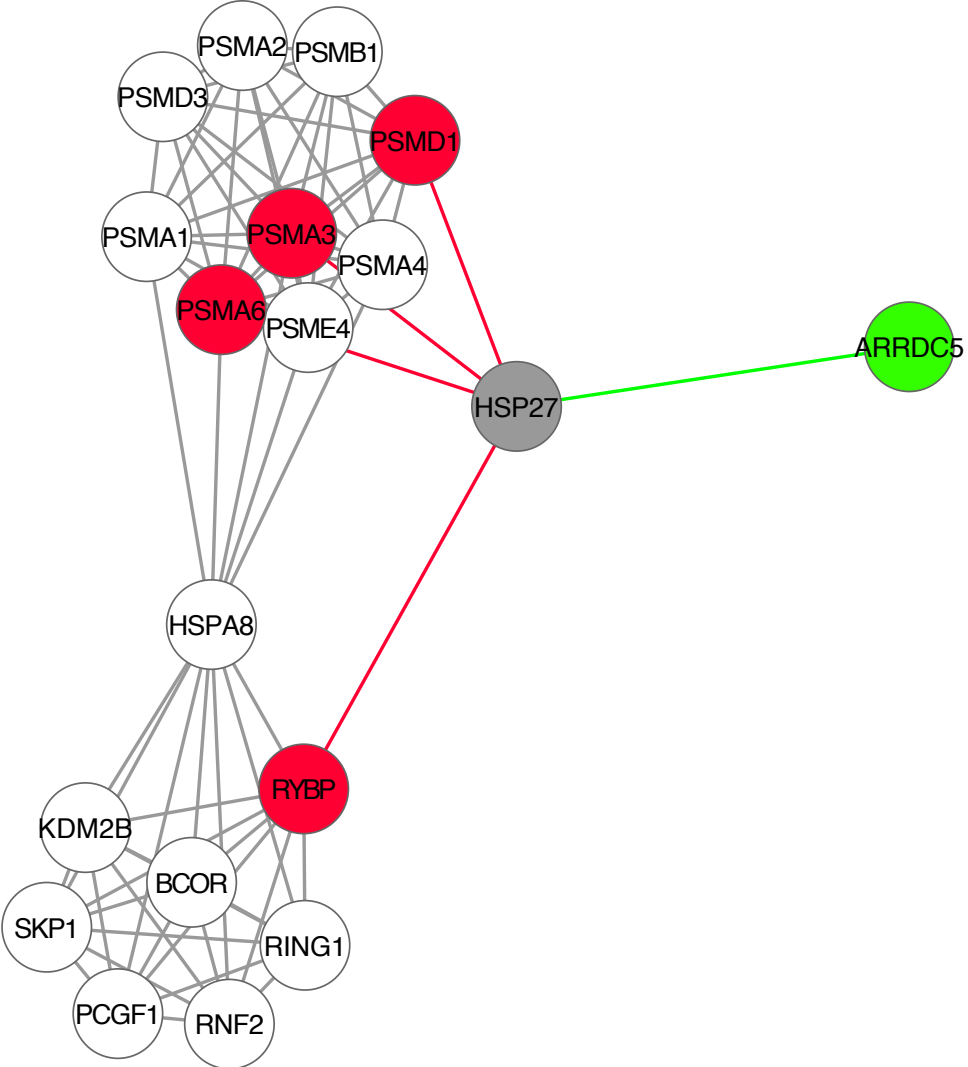

Module 45

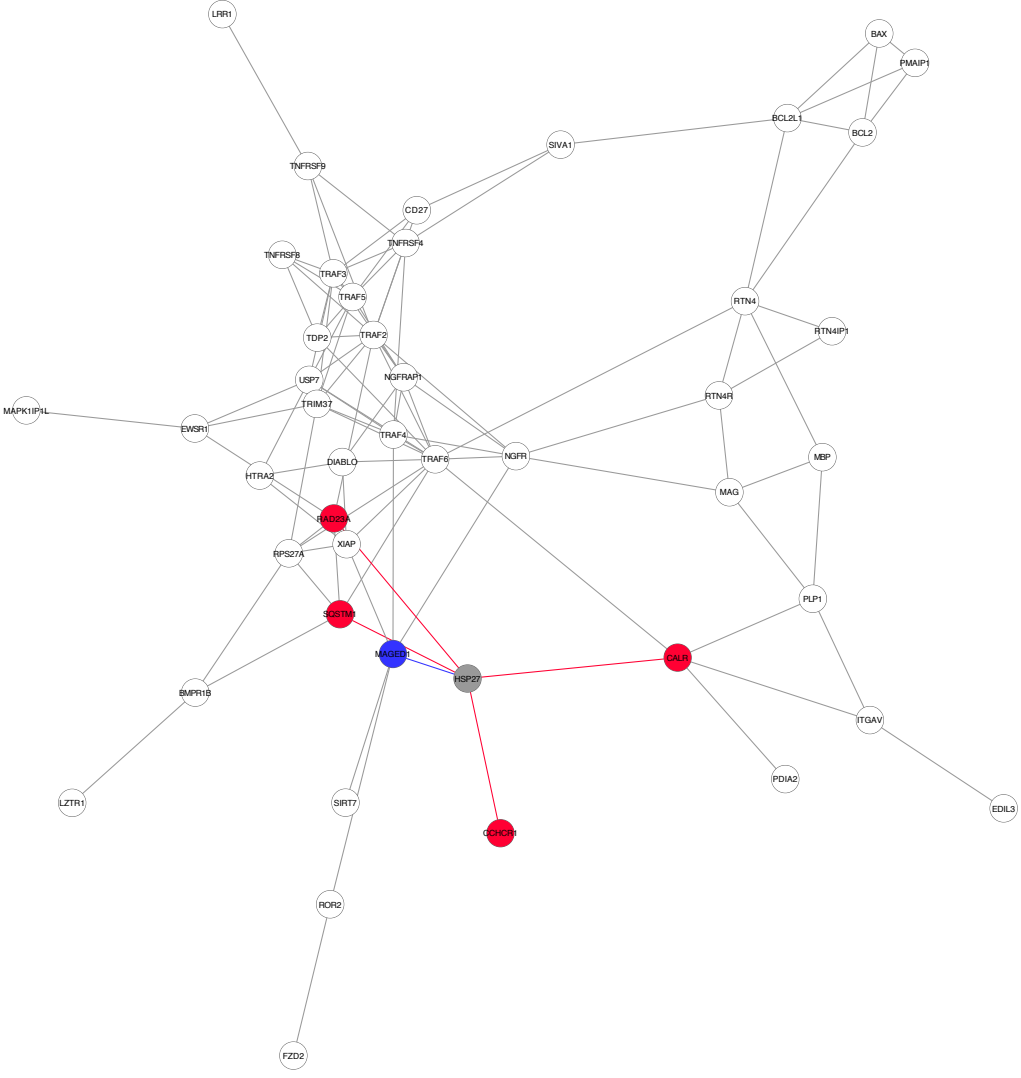

Module 46

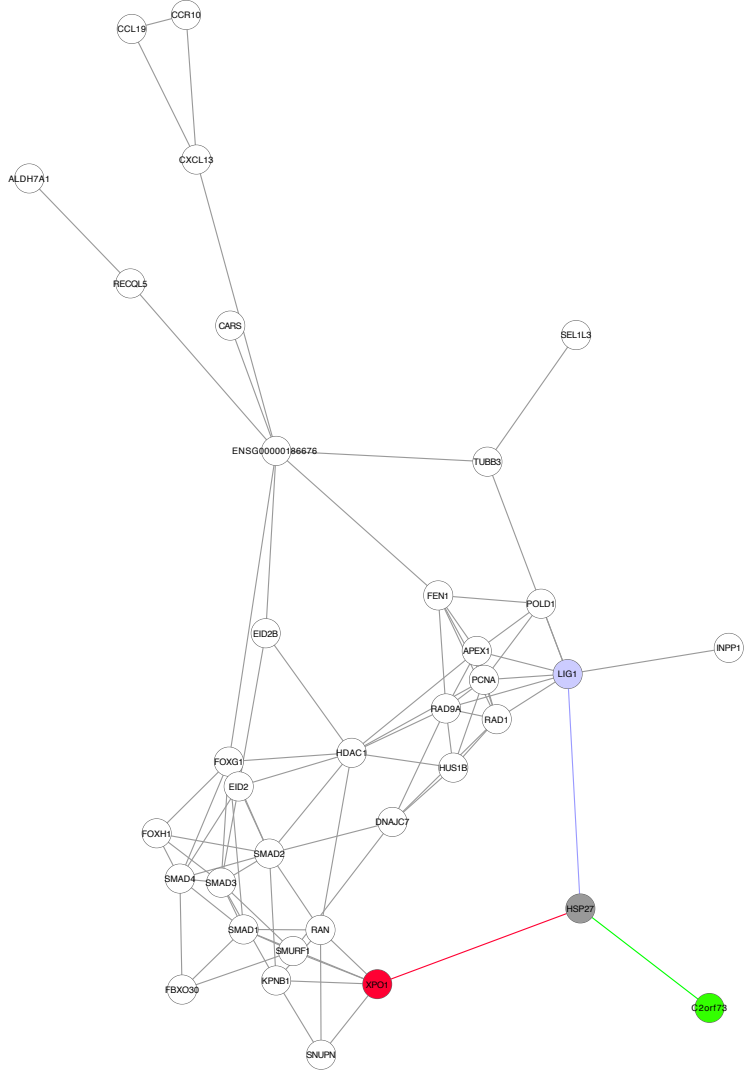

Module 47

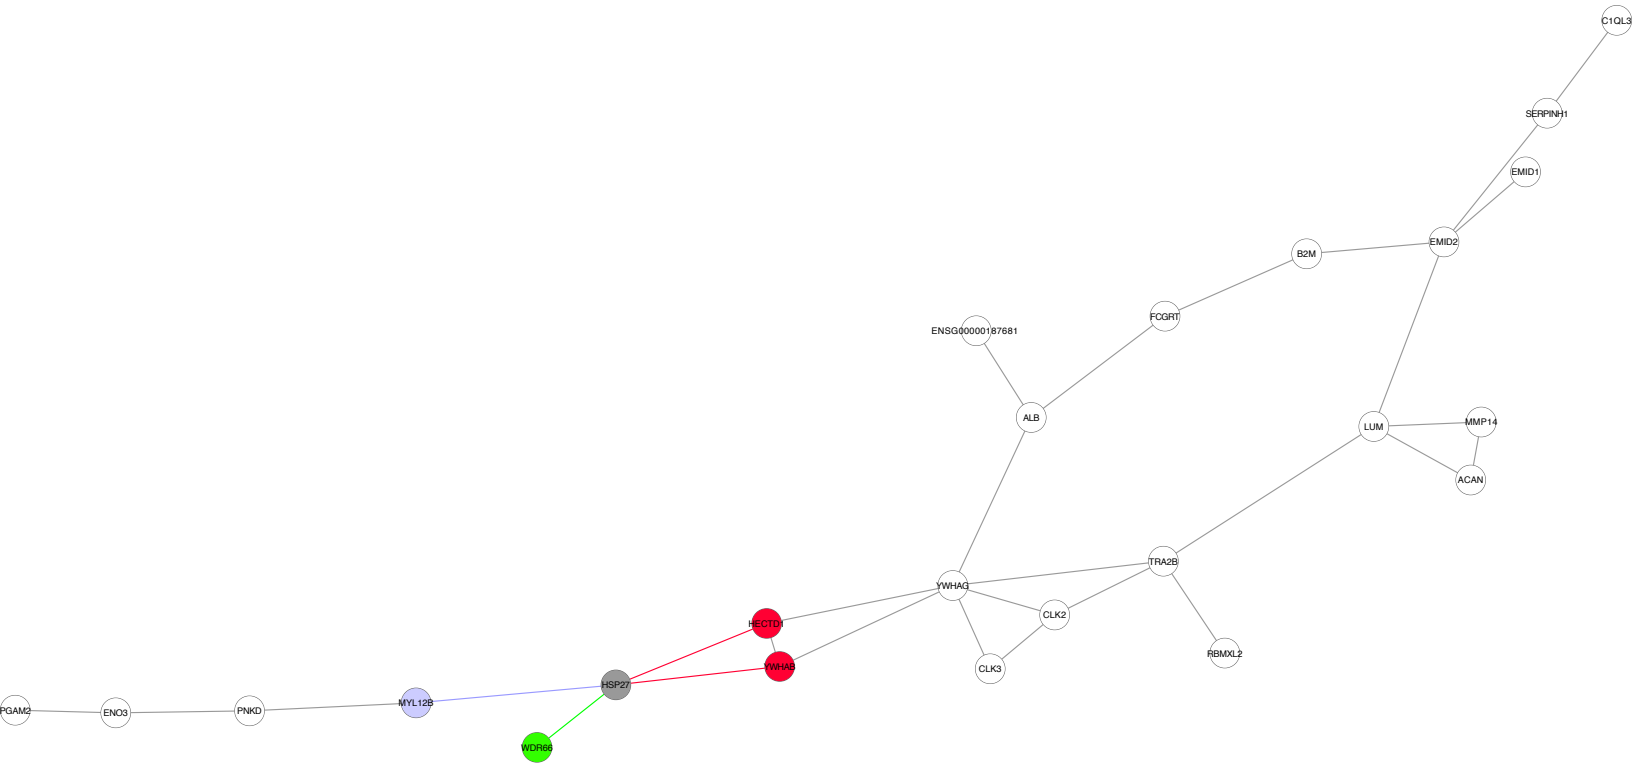

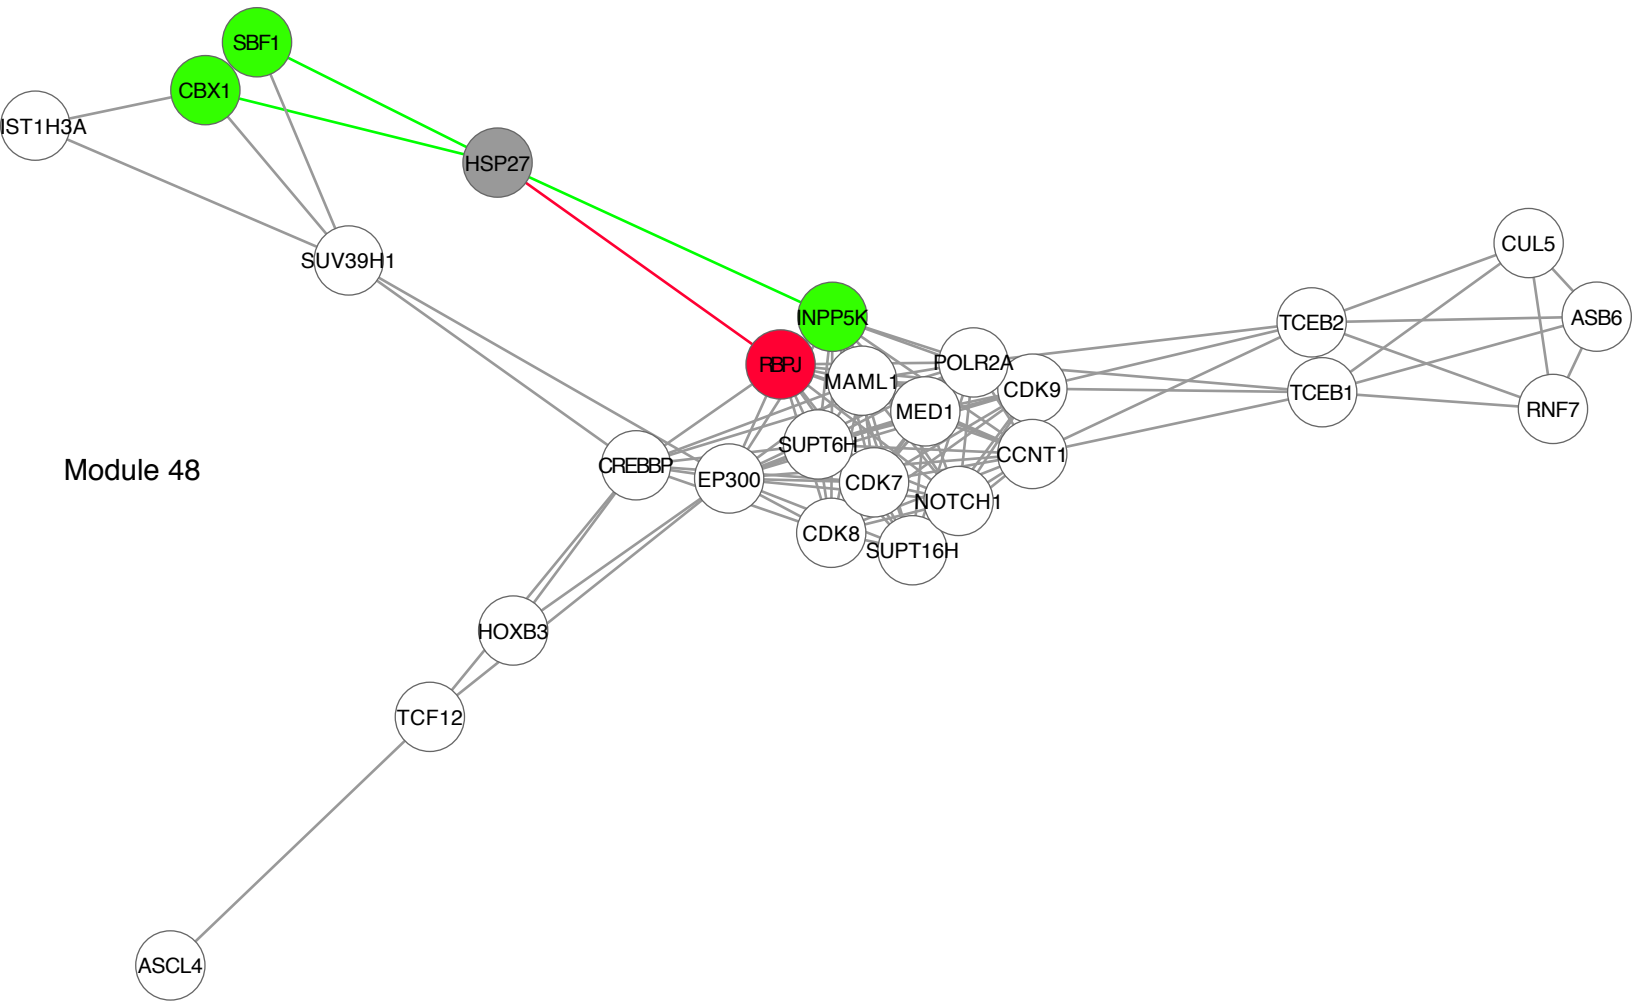



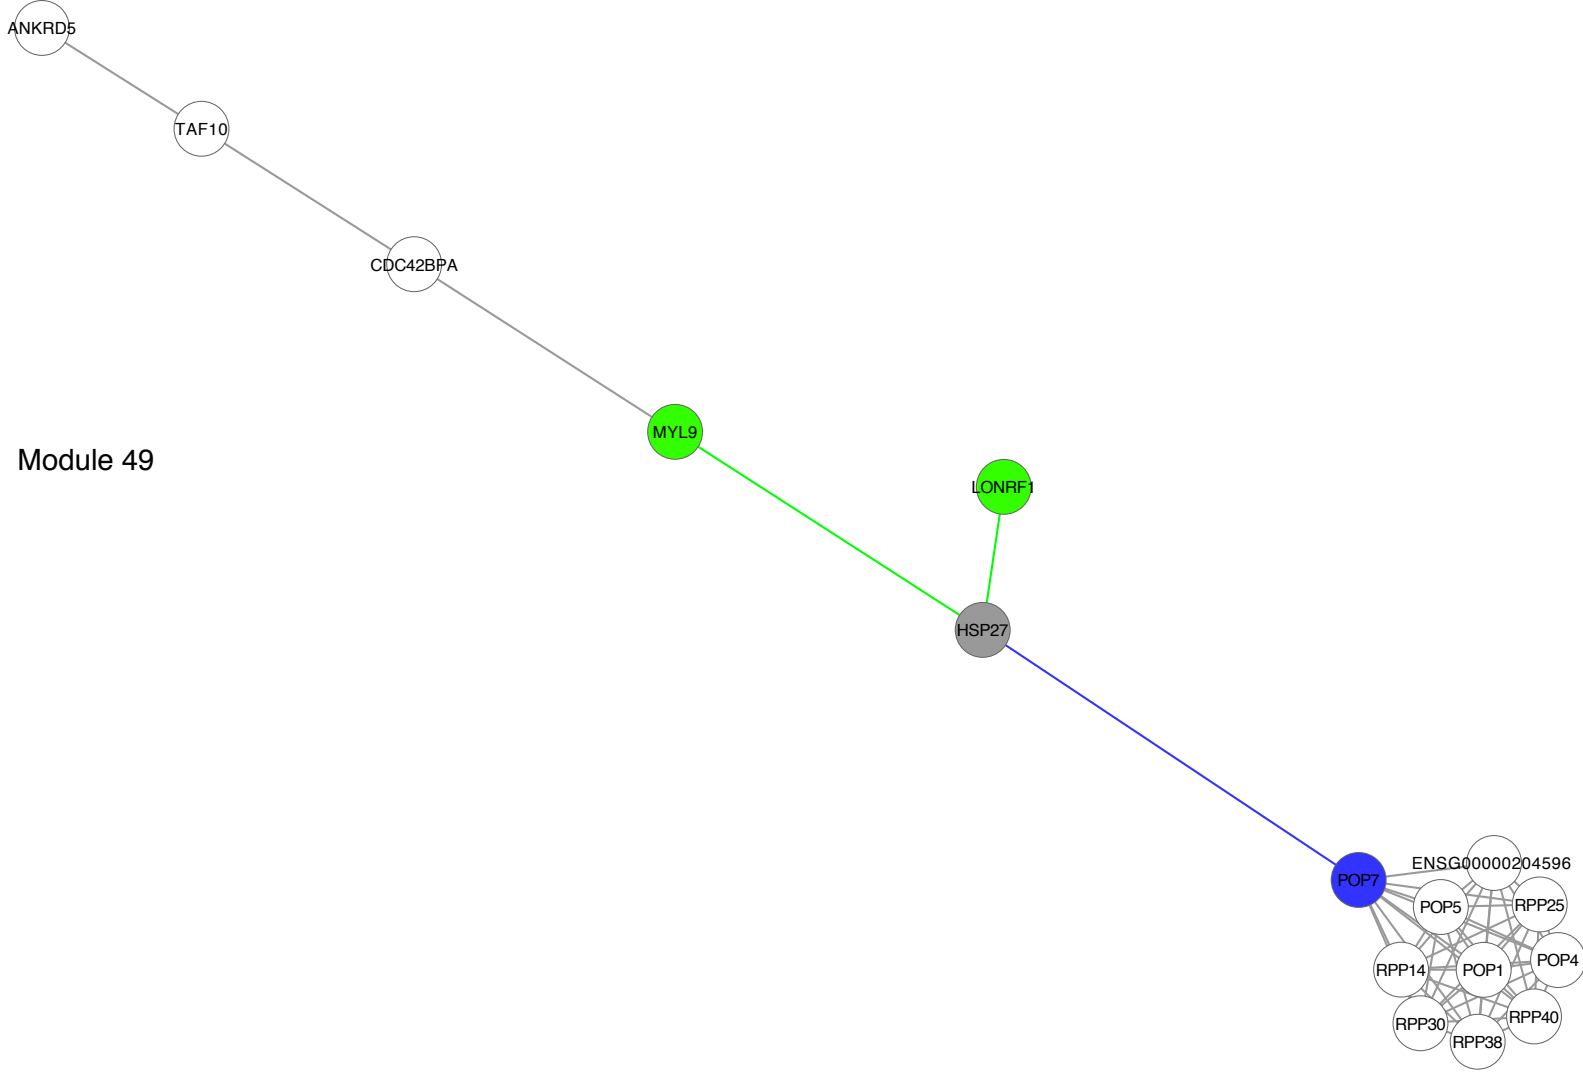



# Module 51

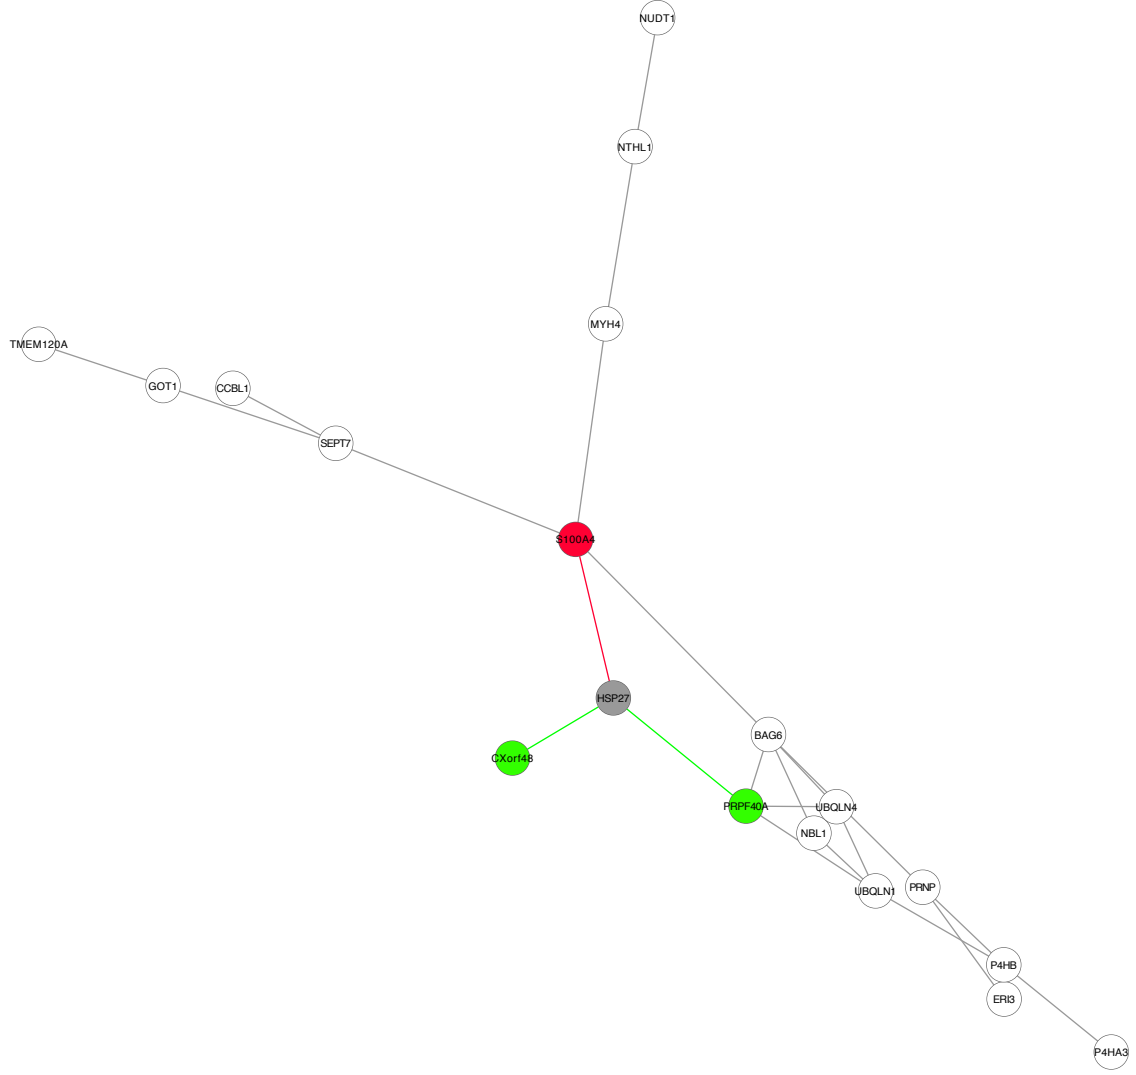

Module 52

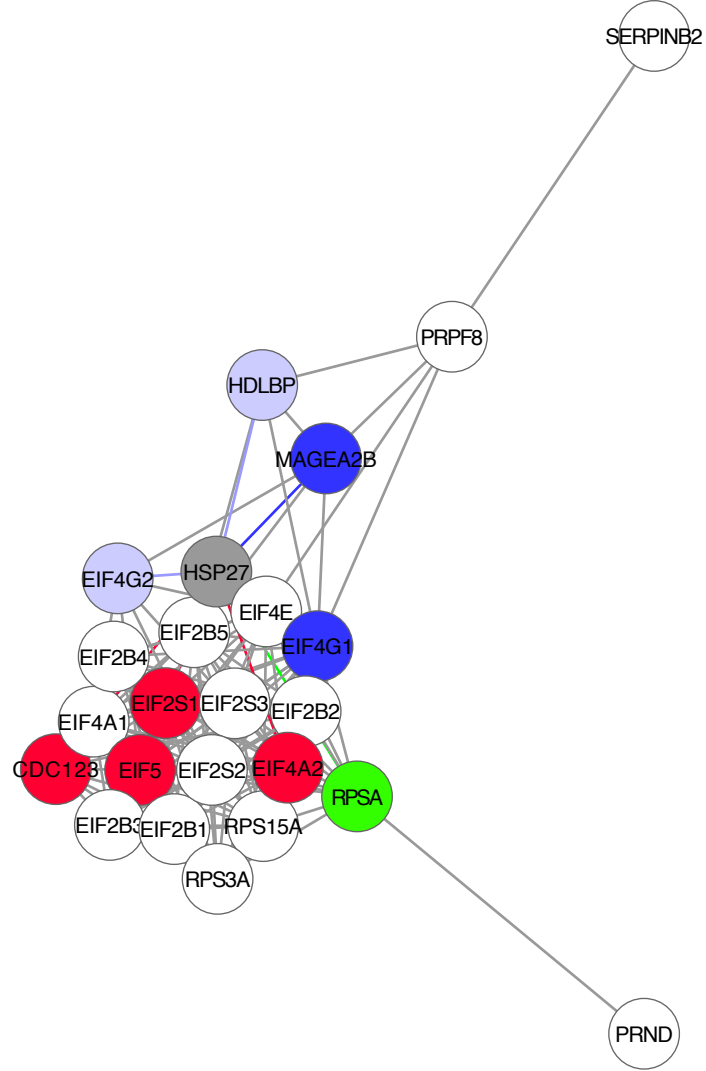



Module 54

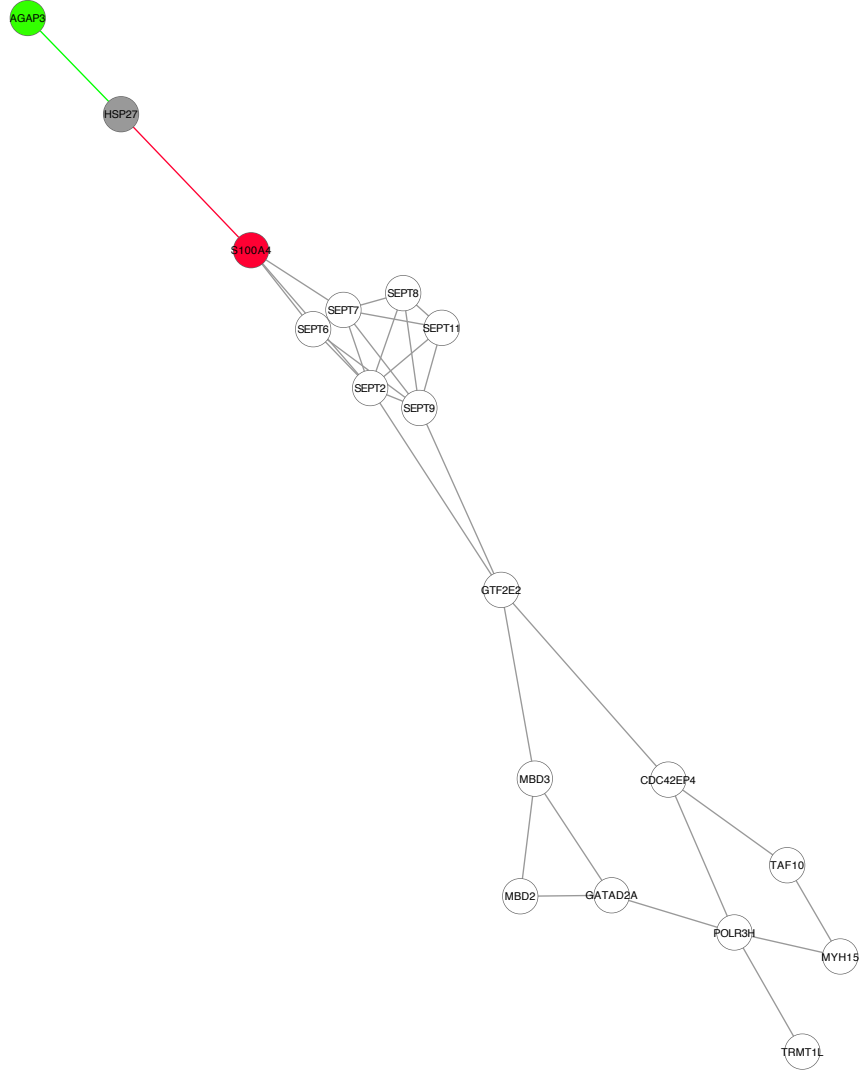

Supplement: supp_M114.041228_mcp.M114.041228-2.pdf [file supp_M114.041228_mcp.M114.041228-2.pdf]
